1  
2  
3  
4  
5  
6  
7  
8  
9  
10  
11  
12  
13  
14  
15  
16

## **Astrocytes Contribute to Remote Memory Formation by Modulating Hippocampal-Cortical Communication During Learning**

Adi Kol<sup>1</sup>, Adar Adamsky<sup>1</sup>, Maya Groysman<sup>2</sup>, Tirzah Kreisel<sup>1</sup>, Michael London<sup>1,3</sup>, Inbal Goshen<sup>1§</sup>

1. Edmond and Lily Safra Center for Brain Sciences (ELSC), 2. ELSC Vector Core Facility, and 3. Alexander Silberman Institute of Life Sciences, The Hebrew University of Jerusalem, Jerusalem, 91904 Israel.

§ Address correspondence to [inbal.goshen@elsc.huji.ac.il](mailto:inbal.goshen@elsc.huji.ac.il)

1     **ABSTRACT**

2     The consolidation and retrieval of remote memories depend on the coordinated activity of  
3     the hippocampus and frontal cortices. However, the exact time at which these regions are  
4     recruited to support memory and the interactions between them are still debated. Astrocytes  
5     can sense and modify neuronal activity with great precision, but their role in cognitive  
6     function has not been extensively explored. To investigate the role of astrocytes in remote  
7     memory we expressed the Gi-coupled receptor hM4Di in CA1 astrocytes, allowing their  
8     manipulation by a designer drug. We discovered that astrocytic modulation during learning  
9     resulted in a specific impairment in remote, but not recent, memory recall, accompanied by  
10    decreased neuronal activity in the anterior cingulate cortex (ACC) during retrieval. We  
11    revealed a massive recruitment of ACC-projecting neurons in CA1 during memory  
12    acquisition, accompanied by activation of ACC neurons. Astrocytic Gi activation disrupted  
13    CA3 to CA1 communication in-vivo, and reduced the downstream response in the ACC.  
14    This same manipulation in behaving mice induced a projection-specific inhibition of ACC-  
15    projecting CA1 neurons during learning, consequently preventing the recruitment of the  
16    ACC. Our findings suggest that the foundation of remote memory is established in the ACC  
17    during acquisition, engaging a distinct process from the one supporting consolidation of  
18    recent memory. Furthermore, the mechanism underlying remote memory involves  
19    projection-specific functions of astrocytes in regulating neuronal activity.

20

21

22    **KEY WORDS**

23    Astrocytes, Hippocampus, Anterior Cingulate Cortex (ACC), Fear conditioning, Remote  
24    Memory, Non Associative Place Recognition, In-Vivo Recording, Chemogenetics, hM4Di,  
25    Optogenetics, cFos, Neurogenesis.

## 1 INTRODUCTION

2 Remote memories, weeks to decades long, continuously guide our behavior, and are  
3 critically important to any organism, as the longevity of a memory is tightly connected to its  
4 significance. The ongoing interaction between the hippocampus and frontal cortical regions  
5 has been repeatedly shown to transform in the transition from recent (days long) to remote  
6 memory<sup>1-3</sup>. However, the exact time at which each region is recruited, the duration for which  
7 it remains relevant to memory function, and the interactions between these regions, are still  
8 debated.

9 Astrocytes are no longer considered to merely provide homeostatic support to neurons and  
10 encapsulate synapses, as pioneering research has shown that astrocytes can also sense and  
11 modify synaptic activity as an integral part of the 'tripartite synapse'<sup>4,5</sup>. Interestingly,  
12 astrocytes demonstrate extraordinary specificity in their effects on neuronal circuits<sup>6</sup>, at  
13 several levels: First, astrocytes differentially affect neurons based on their genetic identity.  
14 For example, astrocytes in the dorsal striatum selectively respond to, and modulate, the input  
15 onto two populations of medium spiny neurons, expressing either D1 or D2 dopamine  
16 receptors<sup>7</sup>. Similarly, astrocytes selectively modulate the effects of specific inhibitory cell-  
17 types, but not others, in the same brain region<sup>8-11</sup>. Second, astrocytes exert neurotransmitter-  
18 specific effects on neuronal circuits. For instance, astrocytic activation in the central  
19 amygdala specifically depresses excitatory inputs and enhances inhibitory inputs. Finally,  
20 astrocytes exhibit task-specific effects in-vivo, i.e. astrocytic stimulation selectively increases  
21 neuronal activity when coupled with memory acquisition, but not in the absence of learning<sup>12</sup>.  
22 An intriguing open question is whether astrocytes can differentially affect neurons based on  
23 their distant projection target.

24 The integration of novel chemogenetic and optogenetic tools in astrocyte research allows  
25 real-time, reversible manipulation of these cells at the population level, in combination with  
26 electrophysiological and behavioral measurements. Such tools were used in brain slices to  
27 activate intracellular pathways in astrocytes, and show the ability of these cells to selectively  
28 modulate the activity of the neighboring neurons in the amygdala and striatum<sup>13,14</sup>, and induce  
29 de-novo long-term potentiation in the hippocampus<sup>12,15</sup>. The reversibility of chemogenetic and  
30 optogenetic tools allows careful dissection of the effect of astrocytes during the different  
31 stages of memory in behaving animals<sup>16,17</sup>. The recruitment of different intracellular signaling  
32 pathways in astrocytes using such tools is starting to shed light on their complex involvement  
33 in memory processes, with Gq activation in the CA1 during acquisition (but not during recall)

1 resulting in enhanced recent memory<sup>12,15</sup>, and Gs activation resulting in recent memory  
2 impairment<sup>18</sup>.

3 To explore the role of astrocytes in remote memory, and their ability to exert projection-  
4 specific effects, we used chemogenetics to activate the Gi pathway in these cells, and found  
5 that this astrocytic modulation in CA1 during learning resulted in a specific impairment in  
6 remote (but not recent) memory recall, accompanied by decreased activity in the anterior  
7 cingulate cortex (ACC) at the time of retrieval. In-vivo Gi activation in astrocytes disrupted  
8 synaptic transmission from CA3 to CA1 and reduced the downstream recruitment of the  
9 ACC. Finally, we show a dramatic recruitment of CA1 neurons projecting to ACC during  
10 memory acquisition, and a projection-specific inhibition of this population by Gi pathway  
11 activation in CA1 astrocytes.

12

13

## 14 **RESULTS**

15

### 16 **Gi pathway activation in CA1 astrocytes specifically impairs the acquisition of remote** 17 **memory.**

18 To specifically modulate the activity of CA1 astrocytes via the Gi pathway we employed an  
19 AAV8 vector encoding the designer receptor hM4Di fused to mCherry under the control of  
20 the astrocytic GFAP promoter. Stereotactic delivery of this AAV8-GFAP::hM4Di-mCherry  
21 vector resulted in CA1-specific expression restricted to astrocytic outer membranes (Fig.  
22 1A,B), with high penetrance (>85% of the GFAP cells expressed hM4Di; Fig. S1A), and the  
23 promoter provided almost complete specificity (>95% hM4Di positive cells were also GFAP  
24 positive; Fig. S1B). Co-staining with the neuronal nuclei marker NeuN showed no overlap  
25 with hM4Di expression (Figure S1C).

26 Recent work has shown that hM4Di activation in astrocytes mimics the response of these  
27 cells to GABAergic stimuli<sup>14,19</sup>, and induces elevated expression of the immediate-early gene  
28 cFos in-vivo<sup>14,19,20</sup>. To verify this effect in our hands, mice were injected with CNO  
29 (10mg/kg, i.p.), brains were collected 90 min later and stained for cFos. As expected, CNO  
30 dramatically increased cFos levels in astrocytes of hM4Di-expressing mice, compared to  
31 saline-injected controls (Figure 1C;  $p < 0.00005$ , t-test). As cFos is similarly induced by the  
32 recruitment of the Gq pathway<sup>12,20</sup>, it seems not to be a reliable indicator of the nature of  
33 astrocytic activity manipulation, but only to the occurrence of a significant modulation.



1 Previous elegant research demonstrated the necessity of normal astrocytic metabolic  
2 support to memory and showed that chronic genetic manipulations in astrocytes can affect  
3 recent memory<sup>21-27</sup>. The contribution of astrocytes to remote memory, however, was never  
4 investigated. To address this topic, we took advantage of the temporal flexibility offered by  
5 chemogenetic tools, allowing not only cell-specific, but also memory-stage specific (e.g.  
6 during acquisition or recall), reversible modulation of astrocytes<sup>12,13</sup>.

7 To test the effect of astrocytic modulation on cognitive performance, mice were injected  
8 bilaterally with AAV8-GFAP::hM4Di-mCherry into the dorsal CA1, and three weeks later  
9 CNO (10mg/kg, i.p.) was administered 30 minutes before fear conditioning (FC) training, in  
10 which a foot-shock was paired with a novel context and an auditory cue. CNO application in  
11 GFAP::hM4Di mice had no effect on the exploration of the conditioning cage before shock  
12 administration (**Figure S1D**) or on baseline freezing before shock delivery (**Figure 1D left**).  
13 One day later, when CNO was no longer present<sup>28,29</sup>, mice were placed back in the  
14 conditioning context and freezing was quantified. We found no difference in recent memory  
15 retrieval between GFAP::hM4Di mice treated with CNO or with saline during FC acquisition  
16 (**Figure 1D right**). Remarkably, when the same mice were tested in the same context 20 days  
17 later, those treated with CNO during conditioning showed a dramatic impairment in memory  
18 retrieval (**Figure 1E left**;  $p < 0.05$ , t-test). This deficiency was still clearly observed 45 days  
19 after that, when these mice were re-tested in the same context for a third time (**Figure 1E**  
20 **right**;  $p < 0.005$ , t-test). The effect of CA1 astrocytic manipulation was unique to the  
21 hippocampal-dependent contextual memory task, as no effect was observed when the same  
22 mice were tested for auditory-cued memory in a novel context, i.e. both groups demonstrated  
23 similar freezing in response to the tone one day after training (**Figure S1E**;  $F_{(1,10)} = 79.84$ , time  
24 main effect,  $p < 0.001$ ), and 20 days later (**Figure S1F**;  $F_{(1,10)} = 10.00$ , time main effect,  $p < 0.01$ ).

25 We then tested what effects would inhibition of CA1 neurons have on recent and remote  
26 memory recall. We injected mice with an AAV5-CaMKII $\alpha$ ::hM4Di-mCherry vector to  
27 induce hM4Di expression in CA1 glutamatergic neurons (**Figure S1G**). To test the effect of  
28 direct neuronal inhibition on recent and remote memory acquisition, we injected  
29 CaMKII $\alpha$ ::hM4Di mice with CNO (10mg/kg, i.p.) 30 minutes before FC acquisition. Gi  
30 pathway activation in neurons had no effect on the exploration of the conditioning cage before  
31 tone and shock administration (**Figure S1H**), or on baseline freezing levels (**Figure 1F left**).  
32 Mice were then fear-conditioned, and tested on the next day. As expected, neuronal inhibition  
33 during training resulted in impaired contextual freezing one day later (**Figure 1F middle**;  
34  $p < 0.005$ , t-test). When the same mice were tested in the same context 20 days later, the

1 memory impairment was still apparent (**Figure 1F right**;  $p < 0.05$ , t-test). No significant effect  
 2 on auditory-cued memory in a novel context was observed, at either the recent or the remote  
 3 time points, as both groups demonstrated similar freezing in response to the tone (**Figure S1I-  
 4 J**;  $F_{(1,17)} = 155.44$ , time main effect  $p < 0.000001$ ,  $F_{(1,17)} = 34.72$ , time main effect  $p < 0.00001$ ,  
 5 respectively). Thus, general neuronal inhibition during acquisition impairs both recent and  
 6 remote memory.

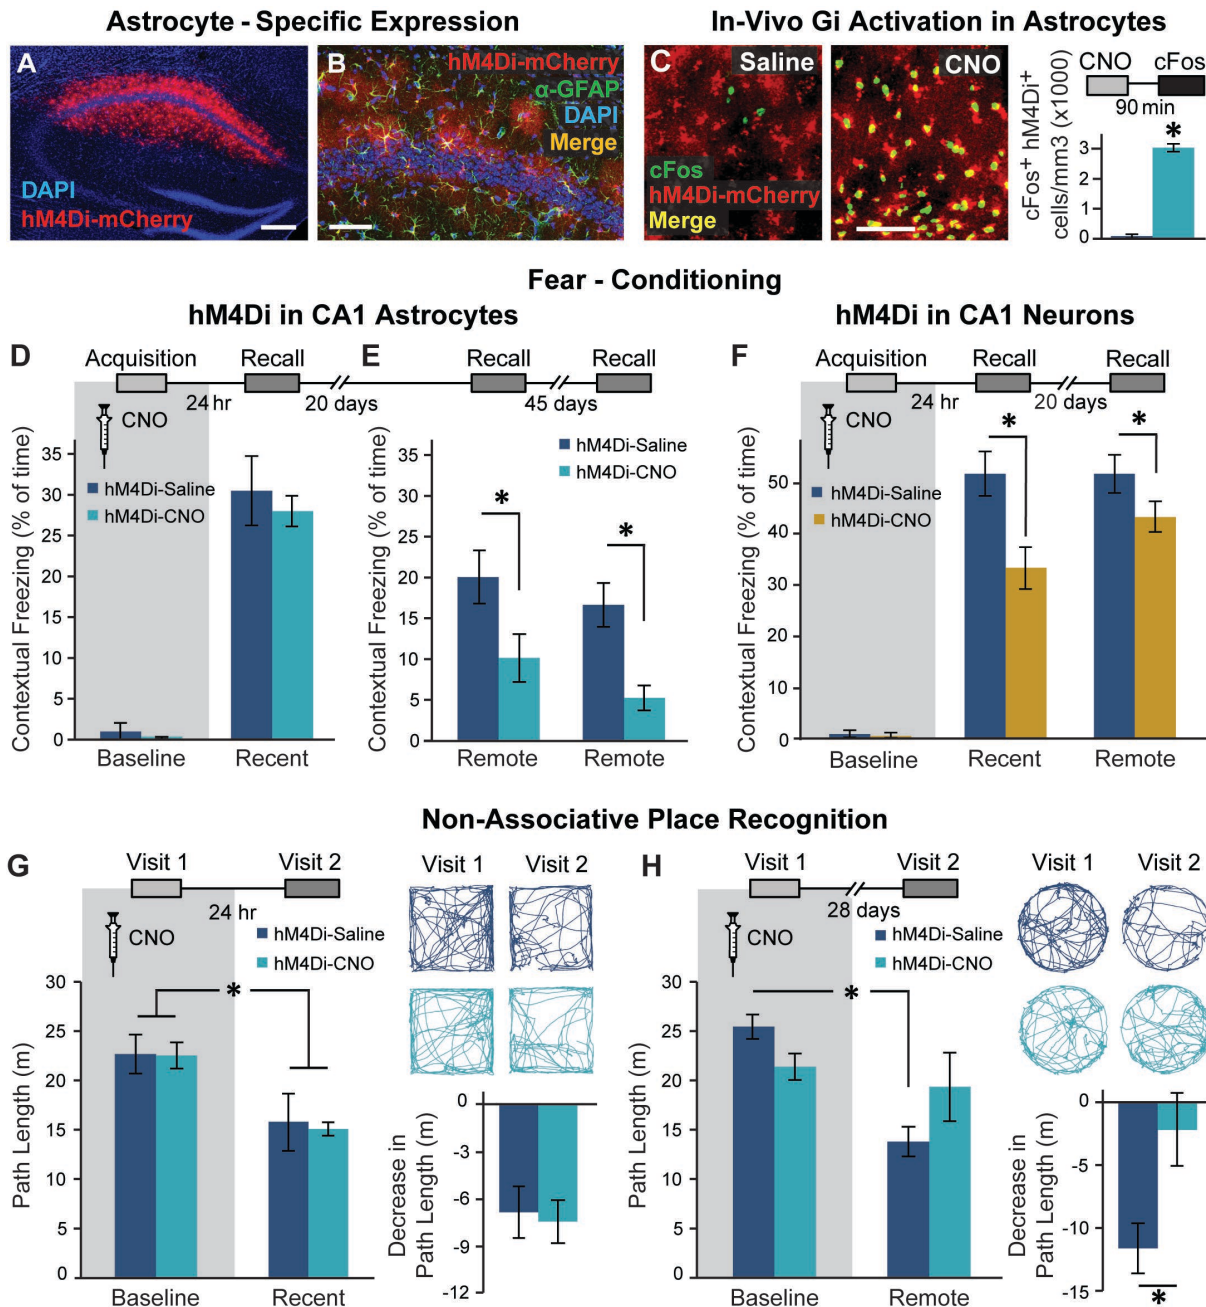

7 **Figure 1. Astrocytic Gi pathway activation in CA1 during learning specifically impaired remote**  
 8 **contextual memory.** (A) Bilateral double injection of AAV8-GFAP::hM4Di-mCherry resulted in  
 9 hM4Di expression selectively in CA1 (scale bar 200 $\mu$ m). (B) hM4Di (red) was expressed in the  
 10 astrocytic membrane around the soma, as well as in the distal processes (scale bar 50 $\mu$ m). (C) CNO

1 administration in-vivo to mice expressing hM4Di (red) in CA1 astrocytes resulted in a significant  
2 increase in cFos expression (green) in these astrocytes, compared to saline injected controls  
3 ( $p < 0.00005$ ,  $n = 2-4$  mice, 6-15 slices per groups; scale bar  $50\mu\text{m}$ ). (D) Mice expressing hM4Di in  
4 their CA1 astrocytes were injected with either Saline ( $n=6$ ) or CNO ( $n=6$ ) 30min before fear  
5 conditioning (FC) acquisition. CNO application before training had no effect on baseline freezing  
6 before shock administration or on recent contextual freezing on the next day compared to Saline  
7 treated controls. (E) CNO application before training resulted in a  $>50\%$  impairment ( $p < 0.05$ ) in  
8 contextual freezing in CNO-treated mice tested 20 days later, compared to Saline treated controls  
9 (*left*). An even bigger impairment of  $>68\%$  ( $p < 0.005$ ) was observed 45 days later (*right*). (F) Mice  
10 expressing hM4Di in their CA1 neurons were injected with either Saline ( $n=9$ ) or CNO ( $n=10$ ) 30min  
11 before FC acquisition. CNO application before training had no effect on baseline freezing before  
12 shock administration, but resulted in decreased recent contextual freezing on the next day ( $p < 0.005$ ),  
13 and decreased remote recall 20 days after that ( $p < 0.05$ ) compared to Saline treated controls. (G) In the  
14 non-associative place recognition test, astrocytic Gi pathway activation by CNO application before a  
15 first visit to a new environment had no effect on recent memory, reflected by a similar decrease  
16 ( $p < 0.0001$ ) in the exploration between Saline injected ( $n=6$ ) and CNO-treated mice ( $n=8$ ). Example  
17 exploration traces and the average change ( $\Delta$ ) in exploration following treatment are shown on the  
18 right. (H) Astrocytic modulation impaired remote recognition of the environment on the second visit,  
19 reflected by a decrease in the exploration only in the Saline injected ( $n=6$ ) ( $p < 0.01$ ), but not CNO-  
20 treated ( $n=6$ ) mice. Example exploration traces and average decrease  $\Delta$  are shown on the right. Data  
21 presented as mean  $\pm$  standard error of the mean (SEM).

22  
23 Effects specific to remote, but not recent, memory were reported in the past in response to  
24 neuronal manipulations during recall (e.g. <sup>30-32</sup>). Based on these reports, we next tested the  
25 necessity of intact astrocytic function during the retrieval of recent and remote memory, by  
26 administering CNO during the recall tests. CNO administration during recent and remote  
27 recall of contextual and auditory-cued memory had no effect on freezing levels compared to  
28 saline-injected controls (Figure S1K-M). Thus, normal astrocytic activity is not required  
29 during either recent or remote memory recall, but only during memory acquisition.

30 To further validate the unexpected effect of astrocytic Gi pathway activation during  
31 acquisition on remote memory in a less stressful task, we employed an additional paradigm,  
32 the 'non-associative place recognition' (NAPR) test. In this task, mice are allowed to explore a  
33 novel open field, and upon re-exposure to the same arena are expected to display decreased  
34 exploration of this now familiar environment. Indeed, GFAP::hM4Di mice injected with  
35 either saline or CNO during NAPR acquisition showed a marked decrease in exploration upon  
36 a second exposure to the square environment to which they were exposed 24 hours earlier, as  
37 expected (Figure 1G;  $F_{(1,12)}=45.69$ , no interaction, time main effect  $p < 0.0001$ ). Another cohort  
38 of GFAP::hM4Di mice injected with saline during NAPR acquisition showed a marked  
39 decrease in exploration upon the second exposure to a round environment to which they were  
40 introduced 4 weeks earlier, as expected. However, exploration level in GFAP::hM4Di mice

1 treated with CNO did not decrease (**Figure 1H left**), suggesting that they did not recall the  
2 remote original experience in this context. These findings were reflected in a significant  
3 treatment by time interaction ( $F_{(1,10)}=5.890$ ,  $p<0.05$ ), and post-hoc analysis showed a  
4 significant difference between the first and second visit only for the saline group ( $p<0.01$ ). A  
5 significant effect was also found for the decrease in exploration of saline and CNO treated  
6 mice ( $p<0.01$ , t-test; **Figure 1H right**). To confirm that these mice are still capable of  
7 performing the NAPR task normally when astrocytic activity is intact, and verify the absence  
8 of non-specific long-term effects, we repeated the experiment in a novel trapezoid  
9 environment with no CNO administration during the first visit, in the same cohort, which now  
10 demonstrated comparable performance between groups (**Figure S1N**;  $F_{(1,10)}=11.855$ , time  
11 main effect  $p<0.01$ , no interaction).

12 To verify that our results did not stem from the CNO application itself, control mice  
13 injected with an AAV8-GFAP::eGFP vector (**Figure S2A**) were trained in the same  
14 behavioral paradigms. CNO administration (10mg/kg, i.p.) in these GFAP::eGFP mice had no  
15 effect on baseline freezing, recent or remote contextual memory (**Figure S2B-C**), or on  
16 performance in the NAPR task upon their second visit to this environment a month later  
17 (**Figure S2D**;  $F_{(1,11)}=58.66$ , time main effect  $p<0.0001$ , no interaction).

18 Our results show that Gi activation in CA1 astrocytes during the acquisition of spatial  
19 memory selectively impairs its remote, but not recent, recall, whereas direct neuronal  
20 inhibition during acquisition impairs both recent and remote memory. These findings raise  
21 two novel hypotheses: First, that the foundation for remote memory is established during  
22 acquisition, in a parallel separate process to recent memory, and can thus be manipulated  
23 independently. And second, that astrocytes are able to specifically modulate the acquisition of  
24 remote memory, with precision not granted by general neuronal inhibition. Both hypotheses  
25 are tested below.

26

### 27 **Astrocytic Gi pathway activation during memory acquisition reduces the recruitment of** 28 **brain regions involved in remote memory, during retrieval.**

29 The transition from recent to remote memory is accompanied by brain-wide  
30 reorganization, including the recruitment of frontal cortical regions like the ACC<sup>1-3,31,33,34</sup>,  
31 indicated by increased expression of cFos<sup>31,33</sup>. To gain insight into changes in the neuronal  
32 activity accompanying the recent and remote retrieval of memories acquired under astrocytic  
33 modulation, GFAP::hM4Di mice were injected with Saline or CNO before FC acquisition,  
34 brains were collected 90 minutes after recent or remote recall, and stained for cFos (**Figure 2B**

1 *top*). We quantified retrieval-induced cFos expression in neurons at CA1 and ACC (**Figure**  
2 **2A**), area repeatedly implicated in remote memory<sup>2,35</sup>. As before, CNO administration to  
3 GFAP::hM4Di mice during acquisition had no effect on recent contextual memory (**Figure 2B**  
4 *bottom*), and changes in cFos expression following recent recall in either CA1 or ACC were  
5 not observed (**Figure 2C-E**). Another cohort of GFAP::hM4Di mice was injected with CNO  
6 before acquisition, tested for recent memory 24 hours later, and then for remote recall 21 days  
7 after that. Importantly, we replicated our initial finding that astrocytic modulation during  
8 acquisition specifically impaired remote but not recent contextual memory (**Figure 2F**;  
9  $p < 0.05$ , t-test). Impaired remote memory was accompanied by reduced cFos expression in  
10 both the CA1 ( $p < 0.05$ , t-test) and the ACC ( $p < 0.01$ , t-test) regions (**Figure 2G-I**). We also  
11 performed the same cFos quantification in brains collected after the last recall test from the  
12 first behavioral experiment (**Figure 1E**), of mice that were injected with CNO >60 days  
13 earlier. In this experiment too, impaired remote recall in GFAP::hM4Di mice treated with  
14 CNO during conditioning was accompanied by reduced cFos expression in CA1 and ACC  
15 compared to saline treated mice (**Figure S3B**;  $p < 0.05$  for both, t-test).

16 In the same mice we also quantified retrieval-induced cFos expression in several additional  
17 brain regions known to be involved in memory: the Dentate Gyrus (DG) of the hippocampus,  
18 the Retrosplenial Cortex (RSC), and the Basolateral Amygdala (BLA) (**Figure S3A**). No  
19 changes in cFos expression in the DG or RSC were observed (**Figure S3C**). BLA cFos  
20 expression was reduced in GFAP::hM4Di mice treated with CNO ( $p < 0.05$ , t-test; **Figure**  
21 **S3C**), which may be attributed to the reduced fear. Finally, to exclude any non-specific effects  
22 of CNO itself, we repeated the same experiments in control GFAP::eGFP mice. As before,  
23 CNO application induced no difference in either recent or remote fear memory, and we found  
24 no alterations in cFos expression (**Figure S3D-K**).

25 Again, we show that astrocytic Gi pathway activation during fear memory acquisition  
26 selectively impaired remote recall, but spared recent retrieval. Moreover, this memory  
27 deficiency was accompanied by reduced activity not only in the CA1, where the astrocytes are  
28 modulated, but also in the ACC, three weeks after manipulation. This temporal association,  
29 however, does not necessarily indicate causality, and two possible explanations can be  
30 offered: 1) that astrocytic disruption induces a long-term process whose consequences are  
31 only observed weeks later, or 2) that it acutely impairs the acquisition of remote (but not  
32 recent) memory. We exclude the first option below, and then test the latter.



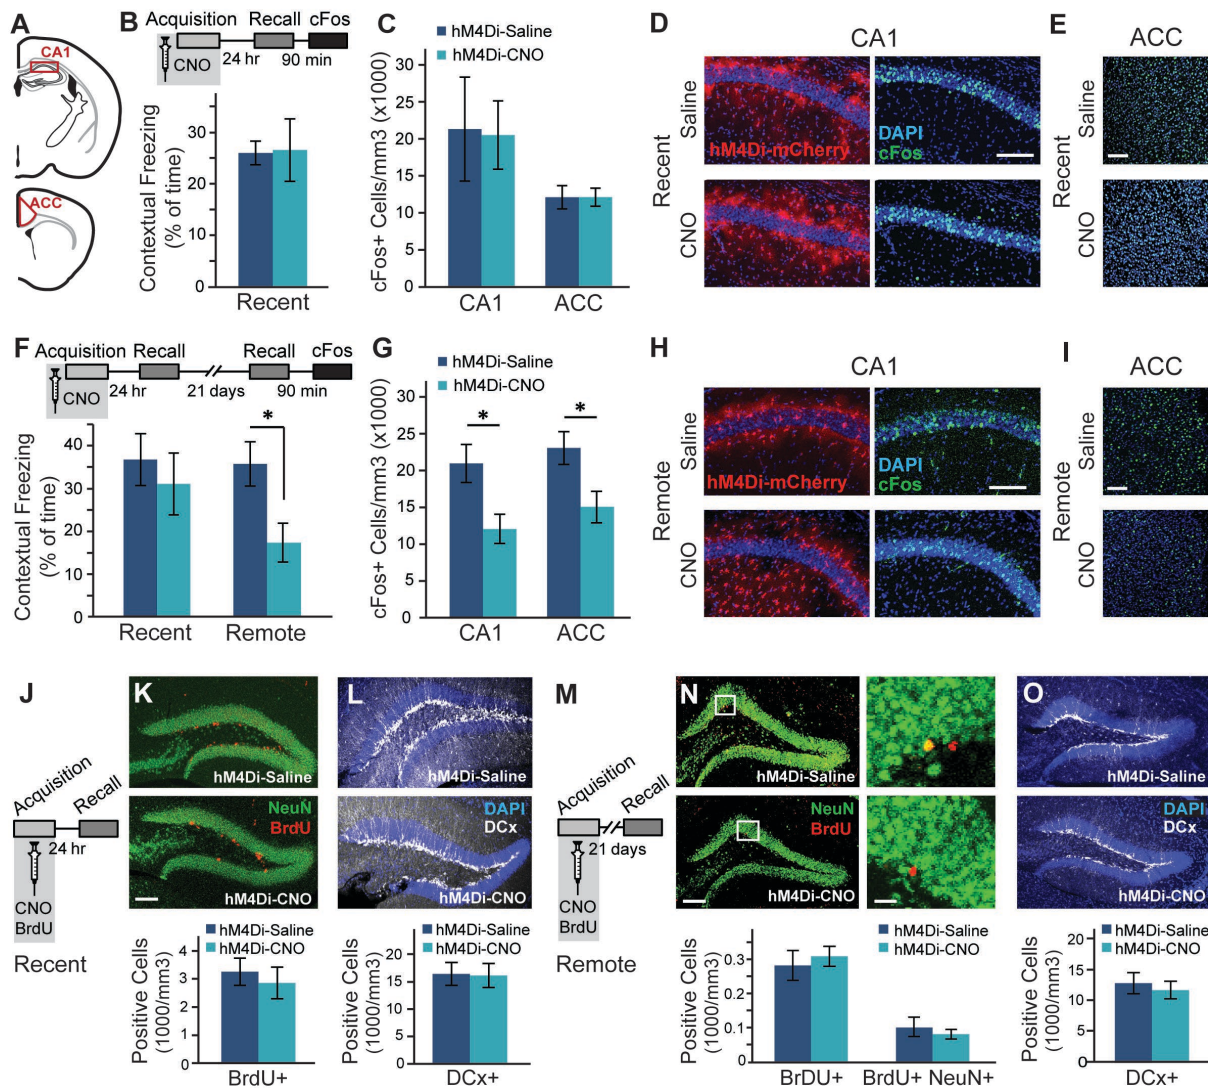

1 **Figure 2. Astrocytic Gi activation during memory acquisition reduced CA1 and ACC activity at**  
2 **the time of remote recall, but did not affect neurogenesis (A)** Active neurons expressing cFos were  
3 quantified in the CA1 and ACC regions. GFAP::hM4Di mice were injected with CNO (n=5) or Saline  
4 (n=5) before fear conditioning, and then tested on the next day. No changes were observed in recent  
5 memory (B) or in the number of neurons active during recall in the CA1 or ACC (C). Representative  
6 images of hM4Di (red) and cFos (green) in the CA1 (D) and ACC (E) are presented. Other  
7 GFAP::hM4Di mice were injected with CNO (n=5) or Saline (n=6) before fear conditioning, and then  
8 tested on the next day and again 21 days later. No changes were observed in recent memory (F left).  
9 However, CNO application before training resulted in >50% reduction (p<0.05) in contextual freezing  
10 21 days later, compared to Saline treated controls (F right). Impaired remote recall was accompanied  
11 by reduced number of cFos-expressing neurons in CA1 and ACC (p<0.05 and p<0.01,  
12 respectively)(G). Representative images of the CA1 (H) and ACC (I) are presented. (J)  
13 GFAP::hM4Di mice were injected with CNO (n=5) or Saline (n=5) together with BrdU before fear  
14 conditioning, and then tested on the next day. No changes were observed in stem cell proliferation  
15 (BrdU in red)(K) or in the number of young, Doublecortin (DCx)-positive neurons (white)(L). (M)  
16 GFAP::hM4Di mice were injected with CNO (n=5) or Saline (n=6) and BrdU before fear  
17 conditioning, and then tested 21 days later. No changes were observed in stem cell proliferation and  
18 differentiation (N) or in the number of young, DCx-positive neurons (O). All scale bars = 100µm,  
19 except zoomed-in image in panel N where scale bar = 10µm. Data presented as mean ± SEM.

## 1 **Modulation of CA1 astrocytes has no effect on hippocampal neurogenesis.**

2 Our findings of intact recent memory followed by impaired remote memory and reduced  
3 hippocampal activity could suggest that astrocytic modulation during acquisition initiated a  
4 long-term process that took weeks to convey its effect. One example for such a process could  
5 be hippocampal neurogenesis occurring between the recent and the remote time points, which  
6 had been repeatedly shown to impair remote memory<sup>36-38</sup>. Based on the existence of a sparse  
7 projection from dorsal CA1 to DG<sup>39</sup>, and potential indirect influence via the entorhinal cortex,  
8 we sought to examine whether astrocytic manipulation induced changes in neurogenesis that  
9 can explain the deterioration in memory performance. To tag newborn cells, we administered  
10 BrdU (100mg/kg, i.p.), together with the CNO or saline injection, to GFAP::hM4Di mice  
11 30min before FC acquisition, and then another dose 2hr after training. Brains from mice  
12 tested for recent contextual memory retrieval were stained for BrdU, tagging the cells added  
13 to the DG since the previous day (Figure 2J). No changes in proliferation (Figure 2K) or in  
14 the number of cells expressing Doublecortin (DCx), a marker of young neurons 3 days to 3  
15 weeks old (Figure 2L), were observed. Brains collected after remote recall were also stained  
16 for BrdU (Figure 2M). No changes in the survival of cells formed on the day of acquisition  
17 three weeks previously, or their differentiation fate (determined by co-staining with the  
18 neuronal marker NeuN) were observed (Figure 2N). Additionally, no change in the number of  
19 young neurons born during these three weeks, marked by DCx, was observed (Figure 2O).  
20 CNO application in GFAP::eGFP control mice had no effect on neurogenesis 24 hours or 21  
21 days later (Figure S3L-Q).

22 To conclude, astrocytic manipulation in CA1 had no effect on hippocampal neurogenesis,  
23 and thus an alternative mechanism to the specific impairment of remote memory was  
24 subsequently investigated.

25

## 26 **Gi pathway activation in CA1 astrocytes prevents the recruitment of the ACC during** 27 **memory acquisition.**

28 Our findings show that remote memory performance and cFos levels in CA1 and ACC are  
29 temporally associated, i.e. when remote recall is low so are cFos levels at the time of recall,  
30 but it is challenging to conclude which phenomenon underlies the other. Furthermore, the  
31 temporal distance between the appearance of these phenotypes and the time of manipulation  
32 three weeks earlier, makes it hard to determine exactly when they were induced. We thus  
33 tested the immediate effects of CA1 astrocytic modulation on neuronal activity at the time of  
34 memory acquisition. GFAP::hM4Di mice were injected with saline or CNO before FC

1 acquisition, and brains were collected 90 minutes later (Figure 3A). CNO administration had  
 2 no effect on immediate freezing in response to the foot-shock (Figure S4A). To control for the  
 3 general effect of astrocytic manipulation on neuronal activity, independent of learning, we  
 4 manipulated astrocytes not only in fear-conditioned but also in home-caged mice. cFos  
 5 expression was quantified in 5 brain regions known to be involved in memory: CA1, ACC,  
 6 BLA, DG and RSC (Figure S4B). Fear conditioning acquisition induced an overall increase in  
 7 cFos expression in the CA1, ACC and BLA ( $F_{(1,21)}=8.097$   $p<0.01$ ;  $F_{(1,17)}=5.071$   $p<0.05$ ;  
 8  $F_{(1,16)}=9.067$   $p<0.01$ ; respectively)(Figure 3B-D; S4C-F), but not in the DG and RSC (Figure  
 9 S4E,G,H). Astrocytic manipulation in CA1 did not significantly affect local neuronal cFos  
 10 expression in this region in either home-caged or fear-conditioned mice (Figure 3B,C; S4C).  
 11 Surprisingly, Gi activation on CA1 astrocytes significantly reduced the learning-induced  
 12 elevation in cFos expression in the ACC, where no direct manipulation took place (Figure  
 13 3B,D; S4D). This result is reflected by a significant treatment by behavior interaction  
 14 ( $F_{(1,17)}=5.036$ ,  $p<0.05$ ; FC-saline vs. FC-CNO post-hoc,  $p<0.05$ ). The effect was specific to  
 15 the ACC, and was not observed in the other non-manipulated regions that were tested, like the  
 16 BLA, DG or RSC (Figure S4E-H).

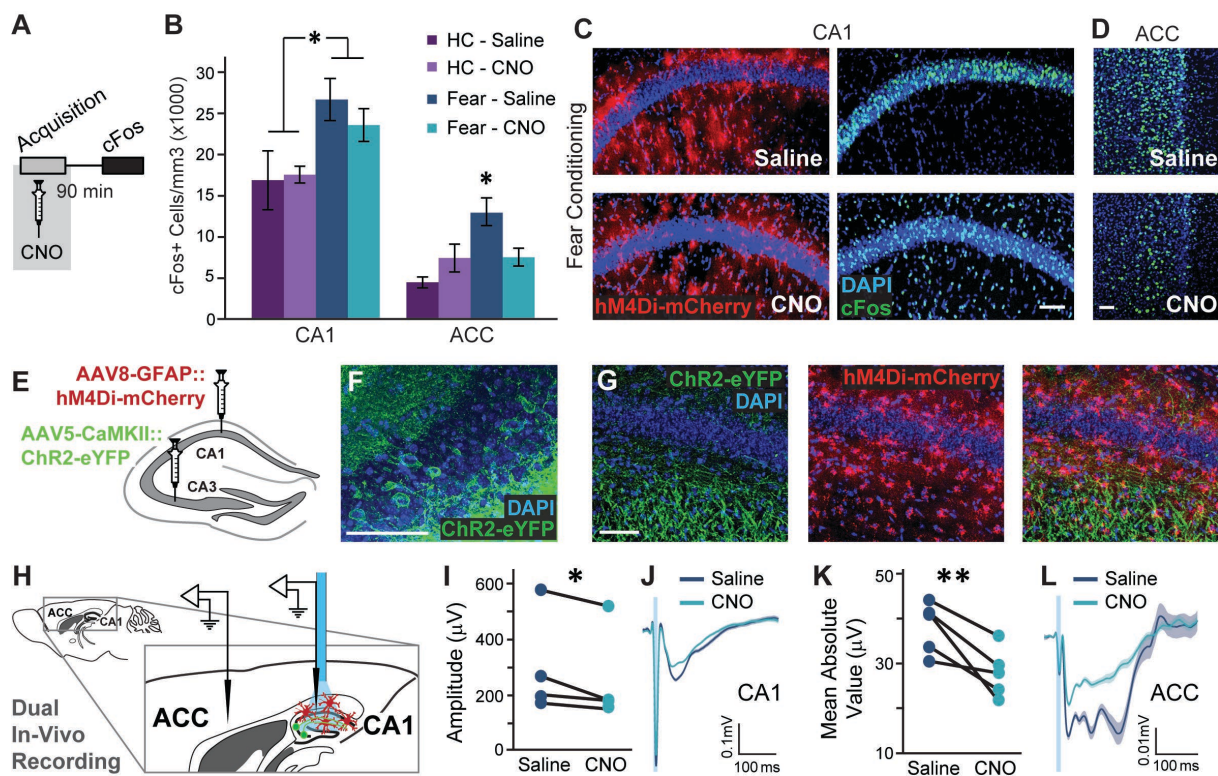

17 **Figure 3. Astrocytic Gi activation in the CA1 prevents the recruitment of the ACC during**  
 18 **memory acquisition, and inhibits CA1 to ACC communication.** (A) GFAP::hM4Di mice were  
 19 injected with CNO (n=9) or Saline (n=9) 30 minutes before fear conditioning, and brains were  
 20 removed 90 minutes later for cFos quantification. (B) Fear-conditioned GFAP::hM4Di mice showed



1 increased cFos levels in the CA1 compared to home-caged mice ( $p < 0.01$ ), but CNO administration  
2 had no effect on either group. cFos levels in the ACC were increased in GFAP::hM4Di that underwent  
3 conditioning after being injected with Saline ( $p < 0.05$ ), but not in CNO-injected mice. Data presented  
4 as mean  $\pm$  SEM. Representative images of hM4Di (red) and cFos (green) in the CA1 (C) and ACC (D)  
5 of fear-conditioned mice are presented. cFos-expressing astrocytes are observed below and above the  
6 CA1 pyramidal layer in CNO-treated mice. (E) AAV5-CaMKII::Channelrhodopsin-2(ChR2)-eYFP  
7 was injected into the CA3 and AAV8-GFAP::hM4Di-mCherry into CA1. (F) ChR2-eYFP was  
8 expressed in the soma of CA3 pyramidal cells. (G) The ChR2-expressing axons (green) are observed  
9 in the CA1 *stratum radiatum*, and hM4Di-expressing astrocytes (red) are observed in CA1. (H)  
10 Experimental setup: Light was applied to CA1 in anesthetized mice. The response to Schaffer  
11 collaterals optogenetic stimulation was simultaneously recorded in the CA1 and ACC, after Saline  
12 administration, followed by CNO administration. (I) The response in the CA1 to Schaffer collaterals  
13 optogenetic stimulation had a smaller amplitude under Gi-pathway activation by CNO in CA1  
14 astrocytes ( $n = 4$  mice;  $p < 0.05$ ). (J) The average responses from one mouse under Saline and then  
15 under CNO are presented (average in a bold line, SEM in shadow, blue light illumination in semi-  
16 transparent blue). (K) A downstream response of CA1 activation by Schaffer collaterals optogenetic  
17 stimulation was detected in the ACC. The mean absolute value of the complex ACC response was  
18 found to have significantly smaller amplitude under Gi-pathway activation by CNO in CA1 astrocytes  
19 ( $n = 5$  mice;  $p < 0.01$ ). (L) The average responses from one mouse under Saline and then under CNO are  
20 presented (average in a bold line, SEM in shadow). All scale bars = 50  $\mu$ m.

21

22 The finding that astrocytic Gi pathway activation in CA1 prevented the recruitment of the  
23 ACC during learning, suggests a functional CA1  $\rightarrow$  ACC connection, which can be modulated  
24 by hippocampal astrocytes. The existence of a monosynaptic CA1  $\rightarrow$  ACC projection had been  
25 demonstrated<sup>40</sup>, but to the best of our knowledge a functional connection beyond correlated  
26 activity<sup>41</sup> was never reported. To generate synaptic input to CA1 we expressed  
27 channelrhodopsin-2 (ChR2) in CA3 (Figure 3E,F), a major CA1 input source. ChR2-  
28 expressing axons from CA3 were observed in the CA1 stratum radiatum, and hM4Di was  
29 concomitantly expressed in CA1 astrocytes (Figure 3E,G). Importantly, no fluorescence was  
30 detected in the ACC, as there is no direct CA3  $\rightarrow$  ACC projection (Figure S4I,J). Light was  
31 applied to CA1 in anesthetized mice, and the fiber was coupled to an electrode recording the  
32 neuronal response in CA1 to Schaffer collaterals optogenetic stimulation (Figure 3H). A  
33 second electrode was placed in the ACC to record the downstream response to CA1 activation  
34 (Figure 3H, Figure S4I,J). Recordings were performed after i.p. saline administration and then  
35 after i.p. CNO administration. Optogenetic stimulation of the Schaffer collaterals induced a  
36 local response in CA1, which was mildly but significantly reduced by CNO injection ( $p < 0.05$ ,  
37 paired t-test; Figure 3I,J). Astrocytic manipulation in the CA1 had a dramatic effect on the  
38 downstream response in the ACC to stimulation of the Schaffer collaterals, reflected by a  
39 significantly attenuated fEPSP following CNO administration ( $p < 0.01$ , paired t-test; Figure

1 **3K,L**). These results suggest that astrocytic manipulation in CA1 can indeed modulate the  
2 functional connectivity from CA1 to ACC.

3 We show that Gi pathway activation in CA1 astrocytes during fear memory acquisition  
4 prevented the recruitment of the ACC, without having a significant effect on local neuronal  
5 activity in the CA1, and that CA1 astrocytes can indeed modulate the functional CA1→ACC  
6 connectivity. These findings could suggest that astrocytic manipulation selectively blocked  
7 the activity of CA1 neurons projecting to the ACC, resulting in a significant effect on ACC  
8 activity, but only a mild influence on total CA1 activity.

9

### 10 **Gi activation in CA1 astrocytes during memory acquisition specifically prevents the** 11 **recruitment of CA1 neurons projecting to ACC.**

12 From our findings that Gi activation in CA1 astrocytes during learning prevented the  
13 recruitment of the ACC, and that CA1 astrocytes are able to modulate CA1→ACC functional  
14 connectivity, we drew the hypothesis that astrocytic Gi activation can selectively prevent the  
15 recruitment of CA1 neurons projecting to the ACC, without similarly affecting other CA1  
16 neurons.

17 To directly test this hypothesis we tagged these projection neurons, measured their  
18 recruitment during memory acquisition, and how it is affected by astrocytic Gi activation.  
19 Mice were bilaterally injected with a retro-AAV inducing the expression of the Cre  
20 recombinase in excitatory neurons (AAV-retro-CaMKII $\alpha$ ::Cre) into the ACC, and an  
21 additional Cre-dependent virus inducing the expression of GFP (AAV5-ef1 $\alpha$ ::DIO-GFP) into  
22 CA1 (**Figure 4A**). AAV8-GFAP::hM4Di-mCherry was simultaneously injected into the CA1,  
23 to allow astrocytic manipulation (**Figure 4A**). Together, these three vectors induced the  
24 expression of GFP only in CA1 neurons projecting to the ACC, and of hM4Di in hippocampal  
25 astrocytes (**Figure 4B-C**). These mice were injected with saline or CNO 30 minutes before FC  
26 acquisition or in their home cage, and brains were collected 90 minutes later (**Figure 4D top**).  
27 As in the previous experiment, CNO administration had no effect on immediate freezing  
28 following shock administration (**Figure 4D bottom**), FC acquisition induced an overall  
29 increase in cFos expression in the CA1 ( $F_{(1,21)}=12.9$   $p<0.05$ ), and astrocytic modulation was  
30 not sufficient to significantly reduce CA1 cFos expression (**Figure 4E**). Furthermore, as  
31 before, modulation of CA1 astrocytes significantly reduced the learning-induced elevation in  
32 ACC cFos expression (**Figure 4E**;  $p<0.05$ , t-test).

33 When specifically observing the sub-population of ACC-projecting CA1 neurons  
34 (CA1→ACC), these cells were found to be dramatically recruited during memory acquisition,

1 and astrocytic modulation significantly reduced the learning-induced cFos elevation in this  
2 population (Figure 4F). Specifically, in saline treated mice, more than 15% of the CA1→ACC  
3 cells expressed cFos following learning, whereas in CNO-treated GFAP::hM4Di mice less  
4 than 5% CA1→ACC cells were active after learning (Figure 4F-H), a level as low as that of  
5 home-caged mice (Figure 4F; S5A,B). This effect resulted in a significant treatment by  
6 behavior interaction ( $F_{(1,20)}=5.79$ ,  $p<0.05$ ; FC-saline vs. FC-CNO post-hoc  $p<0.05$ ).

7 Finally, to test the specificity of our findings, we then similarly tested an additional  
8 monosynaptic projection from the CA1, terminating at the Nucleus Accumbens (NAc). Mice  
9 were bilaterally injected with AAV-retro-CaMKII::Cre into the NAc, as well as AAV5-  
10  $ef1\alpha$ ::DIO-GFP and AAV8-GFAP::hM4Di-mCherry into CA1 (Figure 4I), to tag CA1  
11 neurons projecting to the NAc, and activate the Gi pathway in astrocytes (Figure 4I-K). These  
12 mice were injected with saline or CNO before FC acquisition, and brains were collected 90  
13 minutes later (Figure 4L top). As in the previous experiment, CNO administration had no  
14 effect on immediate freezing (Figure 4L bottom), and astrocytic modulation was not sufficient  
15 to significantly affect CA1 cFos expression (Figure 4M). Importantly, modulation of CA1  
16 astrocytes had no effect on cFos expression after learning in the NAc (Figure 4M-O). When  
17 we specifically tested cFos expression in the sub-population of NAc-projecting CA1 neurons  
18 (CA1→NAc), we found that astrocytic modulation had no effect on their activity (Figure 4P,  
19 Figure S5C,D).

20 To conclude, we found that astrocytic inhibition in the CA1 specifically prevented the  
21 recruitment of CA1→ACC projecting neurons during memory acquisition. The fact that the  
22 inhibition of this projection is induced by the same manipulation that specifically impairs  
23 remote memory acquisition, suggests that the activity of CA1→ACC neurons during memory  
24 acquisition is necessary for remote recall.

25

## 26 DISCUSSION

27 Recent years have seen a burst in discoveries of hitherto unknown elaborate roles for  
28 astrocytes in the modulation of neuronal activity and plasticity<sup>42</sup>. In this work, we used  
29 advanced tools to modulate CA1 astrocytes, and show for the first time that these cells can  
30 confer specific effects on neurons in their vicinity based on the projection target of these  
31 neurons. Specifically, astrocytic Gi activation during memory acquisition impairs remote, but  
32 not recent, memory retrieval. Another novel finding we present is a massive recruitment of



- 1 ACC- projecting CA1 neurons during memory acquisition, a process specifically inhibited by
- 2 astrocytic manipulation, thus preventing a successful recruitment of the ACC during learning.

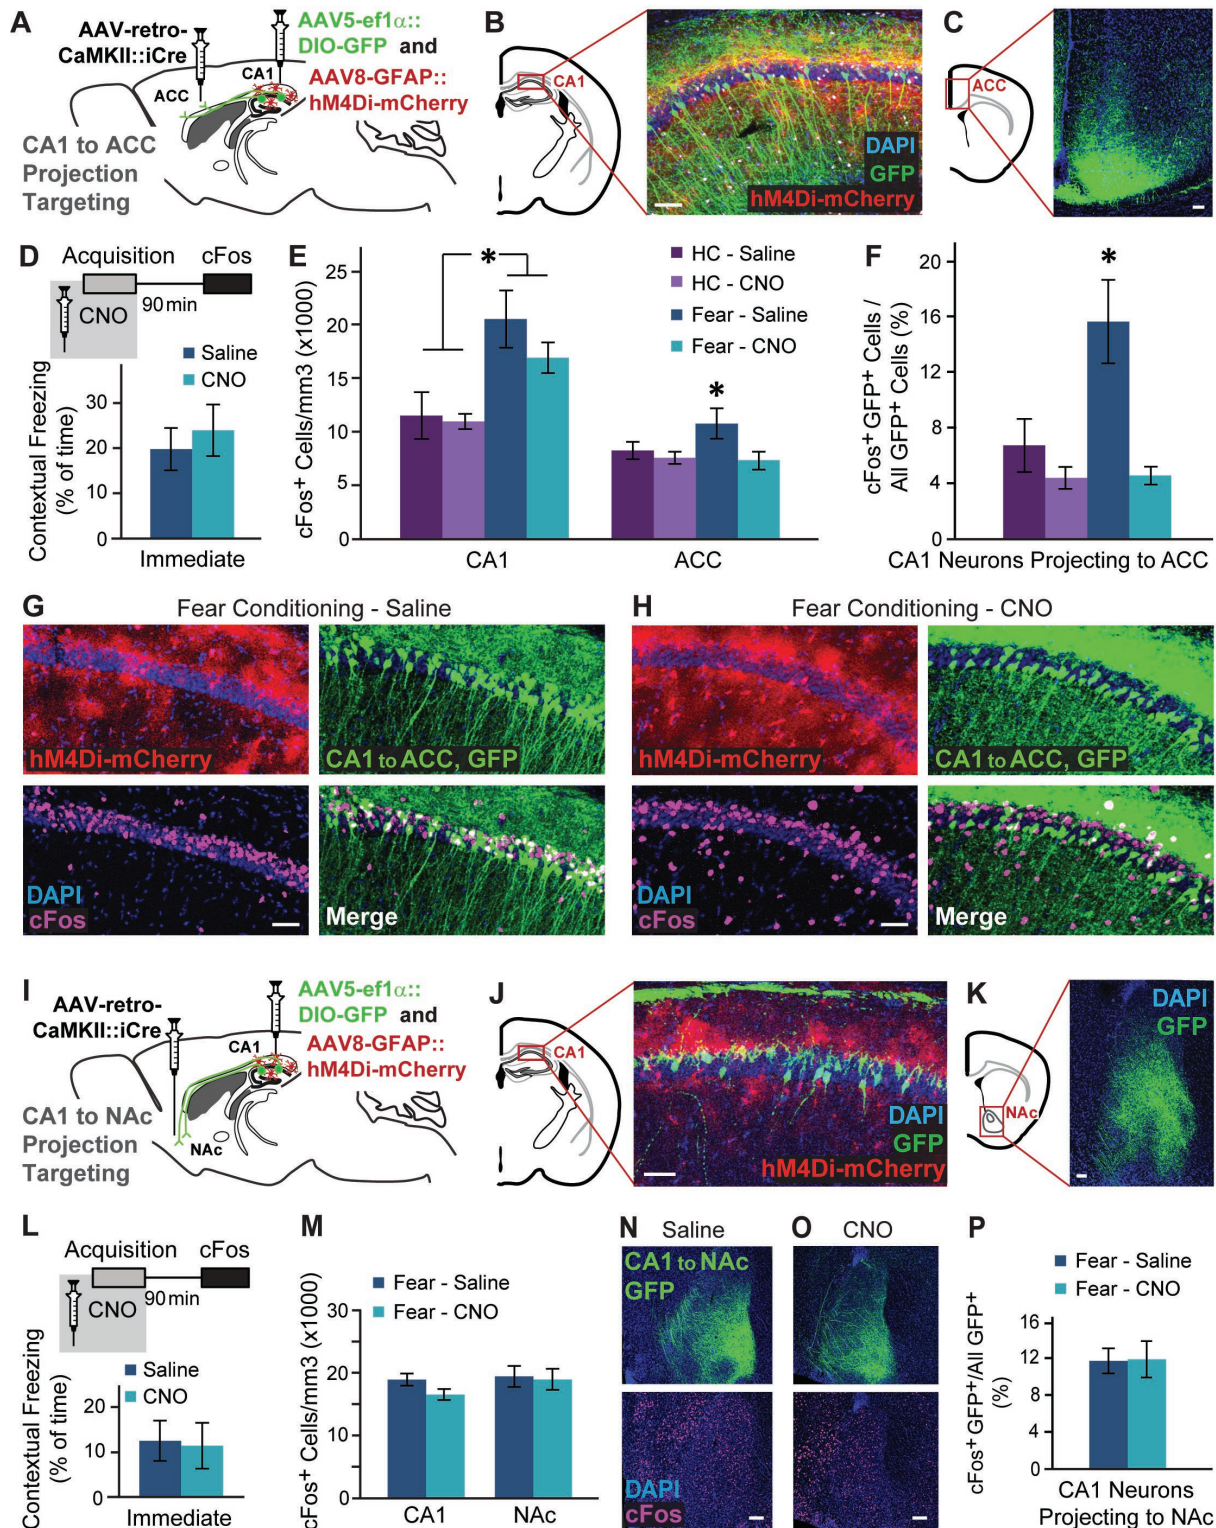

- 3 **Figure 4. Gi pathway activation in CA1 astrocytes during memory acquisition specifically**
- 4 **prevents the recruitment of CA1 neurons projecting to ACC.** (A) AAV-retro-CaMKII::Cre was
- 5 injected into the ACC, and AAV5-ef1 $\alpha$ ::DIO-GFP together with AAV8-GFAP::hM4Di-mCherry were
- 6 injected into CA1. (B) Together, these three vectors induced the expression of GFP (green) in CA1

1 neurons projecting to the ACC, and hM4Di (red) in CA1 astrocytes. (C) GFP-positive axons of CA1  
2 projection neurons are clearly visible in the ACC. (D) Mice expressing GFP in ACC-projecting CA1  
3 neurons and hM4Di in their CA1 astrocytes that were injected with CNO (n=8) or Saline (n=7) 30  
4 minutes before FC showed similar immediate freezing following shock administration. (E) Fear-  
5 conditioned mice showed increased cFos levels in the CA1 compared to home-caged mice ( $p<0.05$ ),  
6 with no effect for CNO administration. cFos levels in the ACC were increased in mice that underwent  
7 conditioning after being injected with Saline ( $p<0.05$ ), but not in CNO-injected mice. (F) Fear-  
8 conditioned mice injected with Saline showed an >130% increase in the percent of CA1 cells  
9 projecting into the ACC that express cFos, compared to home-caged mice ( $p<0.05$ ). CNO  
10 administration completely abolished the recruitment of these cells during learning. Representative  
11 images of hM4Di in astrocytes (red), GFP in ACC-projecting CA1 neurons (green) and cFos (pink) in  
12 the CA1 of Saline- (G) or CNO- (H) injected mice are presented. (I) AAV-retro-CaMKII::Cre was  
13 injected into the NAc, and AAV5-ef1 $\alpha$ ::DIO-GFP together with AAV8-GFAP::hM4Di-mCherry were  
14 injected into CA1. (J) Together, these three vectors induced the expression of GFP (green) in CA1  
15 neurons projecting to the NAc, and hM4Di (red) in CA1 astrocytes. (K) GFP-positive axons of CA1  
16 projection neurons are clearly visible in the NAc. (L) Mice expressing GFP in NAc-projecting CA1  
17 neurons and hM4Di in their CA1 astrocytes that were injected with CNO (n=10) or Saline (n=8) 30  
18 minutes before FC showed similar immediate freezing following shock administration. (M) Fear-  
19 conditioned mice showed no effect for CNO administration on activity in the CA1, and cFos levels in  
20 the NAc were similarly unaltered. Representative images of GFP in the axons of NAc-projecting CA1  
21 neurons (green) and cFos (pink) in the NAc of Saline- (N) or CNO- (O) injected mice are presented.  
22 (P) CNO administration had no effect on the activity of CA1 cells projecting into the NAc. All scale  
23 bars=50 $\mu$ m. Data presented as mean  $\pm$  SEM.

24

25 Previous evidence suggests that astrocytes could have projection-specific effects, based on  
26 either the input source or the output target of their neighboring neurons, but with some  
27 caveats. For example, in the central amygdala, astrocytic activation depressed inputs from the  
28 basolateral amygdala, and enhanced inputs from the central-lateral amygdala<sup>13</sup>. However,  
29 since the former projection is excitatory, and the latter inhibitory, this finding could reflect  
30 specificity to the secreted neurotransmitter, rather than to the source structure sending these  
31 projections. Similarly, two subclasses of astrocytes in the dorsal striatum were shown to  
32 specifically modulate either the direct or the indirect pathways<sup>7</sup>. Nonetheless, since the  
33 populations of striatal medium spiny neurons from which these two projections originate  
34 differ genetically (expressing either the D1 or D2 dopamine receptors), again it is impossible  
35 to determine whether the specificity astrocytes show in their effects on these cells stems from  
36 their surface protein expression or their projection target. Here, we show for the first time  
37 differential effects of astrocytic modulation on CA1 pyramidal cells, based exclusively on  
38 their projection target. These cells may differ from other CA1 cells in the configuration of  
39 input they receive, their activity pattern, and possibly even in hitherto unidentified genetic  
40 properties.

1 The leading hypothesis in the memory field was that the hippocampus has a time-limited  
2 role in memory – required for acquisition and recent recall, and becoming redundant for  
3 remote recall, being replaced by frontal cortices<sup>2</sup>. However, this temporal separation between  
4 the hippocampus and frontal cortex is not so rigid. For example, we and others have shown  
5 that the hippocampus is still critically involved in the consolidation and retrieval of remote  
6 memory (e.g.<sup>31,33,43-45</sup>). Current research now attempts to define the temporal dynamics in the  
7 different brain regions underlying remote memory<sup>33,45</sup>. The evidence regarding the role of  
8 frontal cortices during acquisition is mixed: Inhibition of medial entorhinal cortex input into  
9 the PFC during acquisition specifically impaired remote memory<sup>46</sup>. Conversely, chemogenetic  
10 inhibition of the PFC during acquisition had no effect on remote recall, nor did optogenetic  
11 activation of the PFC neurons that were active at the time of acquisition during remote  
12 recall<sup>47</sup>. The role of the ACC in remote memory retrieval was repeatedly demonstrated by the  
13 finding that ACC inhibition during recall impairs remote but not recent memory in multiple  
14 tasks<sup>e.g.30-32,48,49</sup>, and that sleep deprivation after acquisition, which also impairs only remote  
15 memory, reduces ACC recruitment during recall<sup>50</sup>. However, the time-point at which the ACC  
16 is recruited to support remote memories was never defined. Here, we show that the ACC is  
17 recruited at the time of initial acquisition, but the significance of this early activity is only  
18 revealed at the remote recall time point. We further demonstrate, for the first time, massive  
19 recruitment of ACC-projecting cells in the CA1 during learning, and show that specific  
20 inhibition of this projection at this time-point by astrocytes prevents the engagement of the  
21 ACC during acquisition, and results in impaired remote (but not recent) memory. When a  
22 non-specific CA1 inhibition is induced by direct neuronal Gi pathway activation, both recent  
23 and remote memory is impaired.

24  
25 We have previously shown that astrocytic activation in CA1 can result in increased  
26 neuronal activity in a task-dependent manner and enhance recent memory recall. In this work,  
27 we reveal another novel capacity of astrocytes – to affect their neighboring neurons based on  
28 their projection target. This finding further expands the repertoire of sophisticated ways by  
29 which astrocytes shape neuronal networks and consequently high cognitive function.



## 1 ACKNOWLEDGMENTS

2 We thank the entire Goshen lab for their support. AK is supported by the ELSC graduate  
3 students scholarship. AA is supported by the Adams fellowship. This project has received  
4 funding from the European Research Council (ERC) under the European Union's Horizon  
5 2020 research and innovation programme (grant agreement No 803589 to IG). IG is also  
6 supported by the Israel Science Foundation (ISF grant No. 1815/18), the Israeli Centers of  
7 Research Excellence Program (center No. 1916/12), and the Canada-Israel grants (CIHR-ISF,  
8 grant No. 2591/18). ML is a Sachs Family Lecturer in Brain Science and is supported by the  
9 ISF (ISF grant No. 1024/17) and the Einstein Foundation. We thank Yaniv Ziv, Ami Citri,  
10 Inna Slutsky, and Adi Doron for the critical reading of the manuscript.

11

## 12 REFERENCES

- 13 1 Moscovitch, M., Cabeza, R., Winocur, G. & Nadel, L. Episodic Memory and Beyond:  
14 The Hippocampus and Neocortex in Transformation. *Annual review of psychology* **67**,  
15 105-134, doi:10.1146/annurev-psych-113011-143733 (2016).
- 16 2 Frankland, P. W. & Bontempi, B. The organization of recent and remote memories.  
17 *Nature reviews. Neuroscience* **6**, 119-130, doi:10.1038/nrn1607 (2005).
- 18 3 Doron, A. & Goshen, I. Investigating the transition from recent to remote memory  
19 using advanced tools. *Brain research bulletin* **141**, 35-43,  
20 doi:10.1016/j.brainresbull.2017.09.005 (2018).
- 21 4 Araque, A., Parpura, V., Sanzgiri, R. P. & Haydon, P. G. Tripartite synapses: glia, the  
22 unacknowledged partner. *Trends in neurosciences* **22**, 208-215 (1999).
- 23 5 Haydon, P. G. GLIA: listening and talking to the synapse. *Nature reviews.*  
24 *Neuroscience* **2**, 185-193, doi:10.1038/35058528 (2001).
- 25 6 Durkee, C. A. & Araque, A. Diversity and Specificity of Astrocyte-neuron  
26 Communication. *Neuroscience* **396**, 73-78, doi:10.1016/j.neuroscience.2018.11.010  
27 (2019).
- 28 7 Martin, R., Bajo-Graneras, R., Moratalla, R., Perea, G. & Araque, A. Circuit-specific  
29 signaling in astrocyte-neuron networks in basal ganglia pathways. *Science* **349**, 730-  
30 734, doi:10.1126/science.aaa7945 (2015).
- 31 8 Perea, G., Yang, A., Boyden, E. S. & Sur, M. Optogenetic astrocyte activation  
32 modulates response selectivity of visual cortex neurons in vivo. *Nature*  
33 *communications* **5**, 3262, doi:10.1038/ncomms4262 (2014).
- 34 9 Tan, Z. *et al.* Glia-derived ATP inversely regulates excitability of pyramidal and  
35 CCK-positive neurons. *Nature communications* **8**, 13772, doi:10.1038/ncomms13772  
36 (2017).
- 37 10 Matos, M. *et al.* Astrocytes detect and upregulate transmission at inhibitory synapses  
38 of somatostatin interneurons onto pyramidal cells. *Nature communications* **9**, 4254,  
39 doi:10.1038/s41467-018-06731-y (2018).
- 40 11 Deemyad, T., Luthi, J. & Spruston, N. Astrocytes integrate and drive action potential  
41 firing in inhibitory subnetworks. *Nature communications* **9**, 4336,  
42 doi:10.1038/s41467-018-06338-3 (2018).

- 1 12 Adamsky, A. *et al.* Astrocytic Activation Generates De Novo Neuronal Potentiation  
2 and Memory Enhancement. *Cell* **174**, 59-71 e14, doi:10.1016/j.cell.2018.05.002  
3 (2018).
- 4 13 Martin-Fernandez, M. *et al.* Synapse-specific astrocyte gating of amygdala-related  
5 behavior. *Nature neuroscience*, doi:10.1038/nn.4649 (2017).
- 6 14 Nagai, J. *et al.* Hyperactivity with Disrupted Attention by Activation of an Astrocyte  
7 Synaptogenic Cue. *Cell*, doi:10.1016/j.cell.2019.03.019 (2019).
- 8 15 Mederos, S. *et al.* Melanopsin for precise optogenetic activation of astrocyte-neuron  
9 networks. *Glia*, doi:10.1002/glia.23580 (2019).
- 10 16 Goshen, I. The optogenetic revolution in memory research. *Trends in neurosciences*  
11 **37**, 511-522, doi:10.1016/j.tins.2014.06.002 (2014).
- 12 17 Adamsky, A. & Goshen, I. Astrocytes in Memory Function: Pioneering Findings and  
13 Future Directions. *Neuroscience* **370**, 14-26, doi:10.1016/j.neuroscience.2017.05.033  
14 (2018).
- 15 18 Orr, A. G. *et al.* Astrocytic adenosine receptor A2A and Gs-coupled signaling regulate  
16 memory. *Nature neuroscience* **18**, 423-434, doi:10.1038/nn.3930 (2015).
- 17 19 Durkee, C. A. *et al.* Gi/o protein-coupled receptors inhibit neurons but activate  
18 astrocytes and stimulate gliotransmission. *Glia* **67**, 1076-1093, doi:10.1002/glia.23589  
19 (2019).
- 20 20 Chai, H. *et al.* Neural Circuit-Specialized Astrocytes: Transcriptomic, Proteomic,  
21 Morphological, and Functional Evidence. *Neuron* **95**, 531-549 e539,  
22 doi:10.1016/j.neuron.2017.06.029 (2017).
- 23 21 Tadi, M., Allaman, I., Lengacher, S., Grenningloh, G. & Magistretti, P. J. Learning-  
24 Induced Gene Expression in the Hippocampus Reveals a Role of Neuron -Astrocyte  
25 Metabolic Coupling in Long Term Memory. *PloS one* **10**, e0141568,  
26 doi:10.1371/journal.pone.0141568 (2015).
- 27 22 Suzuki, A. *et al.* Astrocyte-neuron lactate transport is required for long-term memory  
28 formation. *Cell* **144**, 810-823, doi:10.1016/j.cell.2011.02.018 (2011).
- 29 23 Gerlai, R., Wojtowicz, J. M., Marks, A. & Roder, J. Overexpression of a calcium-  
30 binding protein, S100 beta, in astrocytes alters synaptic plasticity and impairs spatial  
31 learning in transgenic mice. *Learn Mem* **2**, 26-39 (1995).
- 32 24 Nishiyama, H., Knopfel, T., Endo, S. & Itohara, S. Glial protein S100B modulates  
33 long-term neuronal synaptic plasticity. *Proceedings of the National Academy of*  
34 *Sciences of the United States of America* **99**, 4037-4042, doi:10.1073/pnas.052020999  
35 (2002).
- 36 25 Newman, L. A., Korol, D. L. & Gold, P. E. Lactate produced by glycogenolysis in  
37 astrocytes regulates memory processing. *PloS one* **6**, e28427,  
38 doi:10.1371/journal.pone.0028427 (2011).
- 39 26 Stehberg, J. *et al.* Release of gliotransmitters through astroglial connexin 43  
40 hemichannels is necessary for fear memory consolidation in the basolateral amygdala.  
41 *FASEB journal : official publication of the Federation of American Societies for*  
42 *Experimental Biology* **26**, 3649-3657, doi:10.1096/fj.11-198416 (2012).
- 43 27 Gao, V. *et al.* Astrocytic beta2-adrenergic receptors mediate hippocampal long-term  
44 memory consolidation. *Proceedings of the National Academy of Sciences of the*  
45 *United States of America* **113**, 8526-8531, doi:10.1073/pnas.1605063113 (2016).
- 46 28 Alexander, G. M. *et al.* Remote control of neuronal activity in transgenic mice  
47 expressing evolved G protein-coupled receptors. *Neuron* **63**, 27-39,  
48 doi:10.1016/j.neuron.2009.06.014 (2009).
- 49 29 Urban, D. J. *et al.* Elucidation of The Behavioral Program and Neuronal Network  
50 Encoded by Dorsal Raphe Serotonergic Neurons. *Neuropsychopharmacology : official*



- 1 *publication of the American College of Neuropsychopharmacology* **41**, 1404-1415,  
2 doi:10.1038/npp.2015.293 (2016).
- 3 30 Frankland, P. W., Bontempi, B., Talton, L. E., Kaczmarek, L. & Silva, A. J. The  
4 involvement of the anterior cingulate cortex in remote contextual fear memory.  
5 *Science* **304**, 881-883, doi:10.1126/science.1094804 (2004).
- 6 31 Goshen, I. *et al.* Dynamics of retrieval strategies for remote memories. *Cell* **147**, 678-  
7 689, doi:10.1016/j.cell.2011.09.033 (2011).
- 8 32 Einarsson, E. O., Pors, J. & Nader, K. Systems reconsolidation reveals a selective role  
9 for the anterior cingulate cortex in generalized contextual fear memory expression.  
10 *Neuropsychopharmacology : official publication of the American College of*  
11 *Neuropsychopharmacology* **40**, 480-487, doi:10.1038/npp.2014.197 (2015).
- 12 33 Wheeler, A. L. *et al.* Identification of a functional connectome for long-term fear  
13 memory in mice. *PLoS computational biology* **9**, e1002853,  
14 doi:10.1371/journal.pcbi.1002853 (2013).
- 15 34 Tayler, K. K., Tanaka, K. Z., Reijmers, L. G. & Wiltgen, B. J. Reactivation of neural  
16 ensembles during the retrieval of recent and remote memory. *Current biology : CB* **23**,  
17 99-106, doi:10.1016/j.cub.2012.11.019 (2013).
- 18 35 Doron, A. & Goshen, I. Investigating the transition from recent to remote memory  
19 using advanced tools. *Brain research bulletin*, doi:10.1016/j.brainresbull.2017.09.005  
20 (2017).
- 21 36 Akers, K. G. *et al.* Hippocampal neurogenesis regulates forgetting during adulthood  
22 and infancy. *Science* **344**, 598-602, doi:10.1126/science.1248903 (2014).
- 23 37 Guskjolen, A. *et al.* Recovery of "Lost" Infant Memories in Mice. *Current biology :*  
24 *CB* **28**, 2283-2290 e2283, doi:10.1016/j.cub.2018.05.059 (2018).
- 25 38 Gao, A. *et al.* Elevation of Hippocampal Neurogenesis Induces a Temporally Graded  
26 Pattern of Forgetting of Contextual Fear Memories. *The Journal of neuroscience : the*  
27 *official journal of the Society for Neuroscience* **38**, 3190-3198,  
28 doi:10.1523/JNEUROSCI.3126-17.2018 (2018).
- 29 39 Cenquizca, L. A. & Swanson, L. W. Spatial organization of direct hippocampal field  
30 CA1 axonal projections to the rest of the cerebral cortex. *Brain research reviews* **56**,  
31 1-26, doi:10.1016/j.brainresrev.2007.05.002 (2007).
- 32 40 Rajasethupathy, P. *et al.* Projections from neocortex mediate top-down control of  
33 memory retrieval. *Nature* **526**, 653-659, doi:10.1038/nature15389 (2015).
- 34 41 Wang, D. V. & Ikemoto, S. Coordinated Interaction between Hippocampal Sharp-  
35 Wave Ripples and Anterior Cingulate Unit Activity. *The Journal of neuroscience : the*  
36 *official journal of the Society for Neuroscience* **36**, 10663-10672,  
37 doi:10.1523/JNEUROSCI.1042-16.2016 (2016).
- 38 42 Santello, M., Toni, N. & Volterra, A. Astrocyte function from information processing  
39 to cognition and cognitive impairment. *Nature neuroscience* **22**, 154-166,  
40 doi:10.1038/s41593-018-0325-8 (2019).
- 41 43 Barry, D. N., Coogan, A. N. & Commins, S. The time course of systems consolidation  
42 of spatial memory from recent to remote retention: A comparison of the Immediate  
43 Early Genes Zif268, c-Fos and Arc. *Neurobiology of learning and memory* **128**, 46-55,  
44 doi:10.1016/j.nlm.2015.12.010 (2016).
- 45 44 Lux, V., Atucha, E., Kitsukawa, T. & Sauvage, M. M. Imaging a memory trace over  
46 half a life-time in the medial temporal lobe reveals a time-limited role of CA3 neurons  
47 in retrieval. *eLife* **5**, e11862, doi:10.7554/eLife.11862 (2016).
- 48 45 Vetere, G. *et al.* Chemogenetic Interrogation of a Brain-wide Fear Memory Network  
49 in Mice. *Neuron* **94**, 363-374 e364, doi:10.1016/j.neuron.2017.03.037 (2017).

- 1 46 Kitamura, T. *et al.* Engrams and circuits crucial for systems consolidation of a  
2 memory. *Science* **356**, 73-78, doi:10.1126/science.aam6808 (2017).
- 3 47 DeNardo, L. A. *et al.* Temporal evolution of cortical ensembles promoting remote  
4 memory retrieval. *Nature neuroscience* **22**, 460-469, doi:10.1038/s41593-018-0318-7  
5 (2019).
- 6 48 Teixeira, C. M., Pomedli, S. R., Maei, H. R., Kee, N. & Frankland, P. W. Involvement  
7 of the anterior cingulate cortex in the expression of remote spatial memory. *The*  
8 *Journal of neuroscience : the official journal of the Society for Neuroscience* **26**,  
9 7555-7564, doi:10.1523/JNEUROSCI.1068-06.2006 (2006).
- 10 49 Ding, H. K., Teixeira, C. M. & Frankland, P. W. Inactivation of the anterior cingulate  
11 cortex blocks expression of remote, but not recent, conditioned taste aversion memory.  
12 *Learn Mem* **15**, 290-293, doi:10.1101/lm.905008 (2008).
- 13 50 Rosier, M. *et al.* Post-learning paradoxical sleep deprivation impairs reorganization of  
14 limbic and cortical networks associated with consolidation of remote contextual fear  
15 memory in mice. *Sleep* **41**, doi:10.1093/sleep/zsy188 (2018).

16

## 17 **METHODS**

18

### 19 ***Subjects***

20 Male C57BL6 mice, 6-7 weeks old (Harlan) were group housed on a 12-hr light/dark  
21 cycle with *ad libitum* access to food and water. Experimental protocols were approved by the  
22 Hebrew University Animal Care and Use Committee and met guidelines of the National  
23 Institutes of Health guide for the Care and Use of Laboratory Animals.

24

### 25 ***Virus Production***

26 The pAAV-CaMKII-eGFP plasmid was made by first replacing the CMV promoter in a  
27 pAAV-CMV-eGFP vector with the CaMKII promoter. The pAAV-CaMKII-iCre plasmid was  
28 made by replacing the eGFP gene in the above plasmid with the coding region of iCre  
29 (Addgene 51904). Both pAAV-CaMKII-eGFP and pAAV-CaMKII-iCre plasmids were then  
30 packaged into AAV2-retro serotype viral vector. Similarly, pAAV-EF1-DIO-eGFP (Addgene  
31 37084) plasmid was used to make the AAV5-EF1-DIO-eGFP viral vector. The above viral  
32 vectors were prepared at the ELSC Vector Core Facility (EVCF) at the Hebrew University of  
33 Jerusalem.

34

### 35 ***Stereotactic Virus Injection***

36 Mice were anesthetized with isoflurane, and their head placed in a stereotactic apparatus  
37 (Kopf Instruments, USA). The skull was exposed and a small craniotomy was performed. To  
38 cover the entire dorsal CA1, mice were bilaterally microinjected using the following

1 coordinates: For CA1 (two sites per hemisphere), site 1: anteroposterior (AP), -1.5mm from  
2 bregma, mediolateral (ML),  $\pm$  1mm, dorsoventral (DV), -1.55mm; site 2: AP -2.5mm, ML  
3  $\pm$ 2mm, DV -1.55mm. For ACC: AP 0.25mm, ML  $\pm$  0.4mm, DV -1.8mm. For Schaffer  
4 collaterals optogenetic activation, mice were bilaterally microinjected into the CA3 using the  
5 following coordinates: AP -1.85, ML  $\pm$  2.35, DV -2.25. All microinjections were carried out  
6 using a 10 $\mu$ l syringe and a 34 gauge metal needle (WPI, Sarasota, USA). The injection  
7 volume and flow rate (0.1 $\mu$ l/min) were controlled by an injection pump (WPI). Following  
8 each injection, the needle was left in place for 10 additional minutes to allow for diffusion of  
9 the viral vector away from the needle track, and was then slowly withdrawn. The incision was  
10 closed using Vetbond tissue adhesive. For postoperative care, mice were subcutaneously  
11 injected with Rimadyl (5mg per kg). See supplementary materials for the list of all vectors.

12

### 13 *Immunohistochemistry*

14 3 weeks post-injection mice were transcardially perfused with cold PBS followed by 4%  
15 paraformaldehyde (PFA) in PBS. The brains were extracted, postfixed overnight in 4% PFA  
16 at 4°C, and cryoprotected in 30% sucrose in PBS. Brains were sectioned to a thickness of  
17 40 $\mu$ m using a sliding freezing microtome (Leica SM 2010R) and preserved in a  
18 cryoprotectant solution (25% glycerol and 30% ethylene glycol, in PBS). Free-floating  
19 sections were washed in PBS, incubated for 1 h in blocking solution (1% bovine serum  
20 albumin (BSA) and 0.3% Triton X-100 in PBS), and incubated overnight at 4°C with primary  
21 antibodies (See full list of all antibodies below) in blocking solution. For the cFos staining,  
22 slices were incubated with the primary antibody for 5 nights at 4°C. Sections were then  
23 washed with PBS and incubated for 2 h at room temperature with secondary antibodies (See  
24 supplementary materials) in 1% BSA in PBS. Finally, sections were washed in PBS,  
25 incubated with DAPI (1 $\mu$ g/ml), and mounted on slides with mounting medium (Fluoromount-  
26 G, eBioscience, San-Diego, CA, USA).

27 For neurogenesis staining, BrdU (Sigma 100mg/kg) was injected intraperitoneally  
28 together with the CNO injection, as well as 2 hours after the FC training. 90 minutes after  
29 recent or remote recall, brains were removed and slices prepared as described above. Sections  
30 were fixated in 50% formamide and 50% SSC for 2 hours in 65°C, then incubated in 2N HCl  
31 for 30min at 37°C and neutralized in boric acid for 10min. After PBS washes, sections were  
32 blocked in 1% BSA with 0.1% Triton-X for 1 hour at room temperature. Sections were  
33 incubated with anti-BrdU for 48h at 4°C. Sections were then washed with PBS and incubated  
34 with a secondary antibody for 2 hours at room temperature.

## 1 ***Confocal Microscopy***

2 Confocal fluorescence images were acquired on an Olympus scanning laser microscope  
3 Fluoview FV1000 using 4X and 10X air objectives or 20X and 40X oil immersion objectives.  
4 Image analysis was performed using either ImageJ (NIH) or Fluoview Viewer version 4.2  
5 (Olympus).

## 7 ***Behavioral Testing***

8 The FC apparatus consisted of a conditioning box (18x18x30 cm), with a grid floor  
9 wired to a shock generator surrounded by an acoustic chamber (Ugo Basile), and controlled  
10 by the EthoVision software (Noldus). Three weeks after injections, mice were placed in the  
11 conditioning box for 2min, and then a pure tone (2.9 kHz) was sounded for 20sec, followed  
12 by a 2sec foot shock (0.4 mA). This procedure was then repeated, and 30sec after the delivery  
13 of the second shock mice were returned to their home cages. FC was assessed by a continuous  
14 measurement of freezing (complete immobility), the dominant behavioral fear response.  
15 Freezing was automatically measured throughout the testing trial by the EV tracking software.  
16 To test contextual FC, mice were placed in the original conditioning box, and freezing was  
17 measured for 5min. To test auditory-cued FC, mice were placed in a different context (a  
18 cylinder-shaped cage with stripes on the walls and a smooth floor), freezing was measured for  
19 2.5min, and then a 2.9kHz tone was sounded for 2.5min, during which conditioned freezing  
20 was measured. Mice were tested for recent memory 24hr after acquisition, and for remote  
21 memory 21 or 28 days later. In one experiment, an additional remote memory test was  
22 performed 66 days after acquisition.

23 The non-associative place recognition (NAPR) test was conducted in a round plastic  
24 arena, 54 cm in diameter or a square or a trapezoid arena with an identical area size  
25 (2290cm<sup>2</sup>). Mice were placed in the center of the arena and allowed to freely explore for 5  
26 min. Habituation to the familiar environment (reduced exploration between first and second  
27 exposures) was measured using the EthoVision tracking software.

28 CNO (Tocris) was dissolved in DMSO and then diluted in 0.9% saline solution to yield  
29 a final DMSO concentration of 0.5%. Saline solution for control injections also consisted of  
30 0.5% DMSO. 10mg/kg CNO was intraperitoneally (i.p.) injected 30min before the behavioral  
31 assays. In the relevant experiments, BrdU (sigma B5002, 100mg/kg) was injected i.p. together  
32 with the CNO/Saline and 2 hours after the behavioral experiment.

33 The results of behavioral tests were analyzed by a two-way ANOVA followed by LSD  
34 post-hoc tests, or by Student's t test, as applicable.

## 1 *In-vivo Electrophysiology and Optogenetics*

2 Simultaneous optical stimulation of the Schaffer Collaterals and electrical recordings in  
3 CA1 and ACC were performed as follows: Mice were anesthetized with isoflurane, and an  
4 optrode (an extracellular tungsten electrode ( $1\text{M}\Omega$ ,  $\sim 125\mu\text{m}$ ) glued to an optical fiber ( $200\mu\text{m}$   
5 core diameter, 0.39 NA) with the tip of the electrode protruding  $\sim 400\mu\text{m}$  beyond the fiber  
6 end) was used to record local field potential in Stratum Radiatum and illuminate the Schaffer  
7 Collaterals. fEPSP recordings were conducted with the optrode initially placed above the  
8 dorsal CA1 (AP  $-1.6\text{mm}$ ; ML  $1.1\text{mm}$ ; DV  $-1.1\text{mm}$ ) and gradually lowered in  $0.1\text{mm}$   
9 increments into the Stratum Radiatum ( $-1.55\text{mm}$ ). The optical fiber was coupled to a  $473\text{nm}$   
10 solid-state laser diode (Laserglow Technologies, Toronto, Canada) with  $\sim 10\text{mW}$  of output  
11 from the fiber. fEPSP recordings from the ACC were similarly performed using an  
12 extracellular tungsten electrode ( $1\text{M}\Omega$ ,  $\sim 125\mu\text{m}$ ) placed over the ACC (AP  $0.25\text{mm}$ ; ML  
13  $0.4\text{mm}$ ; DV  $-1.3\text{mm}$ ) and gradually lowered in  $0.1\text{mm}$  increments to  $1.8\text{DV}$ . This electrode  
14 was dipped in DiI ( $1\text{mg}/1.5\text{ml}$  in 99% ethanol; Invitrogen) to validate the position of the  
15 recording site.

16 To optogenetically activate the Schaffer collaterals, blue light ( $473\text{ nm}$ ) was unilaterally  
17 delivered through the optrode. Photostimulation duration was  $10\text{ ms}$ , delivered  $72$  times for  
18 each treatment (saline or CNO) every  $5$  seconds. Saline and CNO were injected i.p. and  
19 recording started  $30$  minutes after each injection.

20 Recordings were carried out using a Multiclamp 700B patch-clamp amplifier  
21 (Molecular Devices). Signals were low-pass filtered at  $5\text{ kHz}$ , digitized and sampled through  
22 an AD converter (Molecular Devices) at  $10\text{ kHz}$ , and stored for off-line analysis using Matlab  
23 (Mathworks Inc.). CA1 responses to Schaffer collaterals stimulation were quantified by  
24 calculating the amplitude of the fEPSPs relative to the mean baseline levels, defined as a  
25  $200\text{ms}$  time window prior to photostimulation. CA1 activation by Schaffer collaterals  
26 stimulation resulted in a complex downstream activity in ACC, lasting approximately  $400\text{ms}$ .  
27 Because this signal had both positive and negative peaks, to estimate the overall magnitude of  
28 the response, we have calculated its mean absolute value over the entire  $400\text{ms}$  period, from  
29 the beginning of photostimulation in CA1.

## 1 *Viral vectors*

| Vector                           | Source          | Dilution                                                            | Injection Volume |
|----------------------------------|-----------------|---------------------------------------------------------------------|------------------|
| AAV8-GFAP::hM4D(Gi)-mCherry      | UNC vector core | 1:10 in PBS<br>When injected alone                                  | 700nl/site       |
|                                  |                 | 1:10 in other vector when injected with AAV5-EF1 $\alpha$ ::DIO-GFP |                  |
| AAV8-GFAP::eGFP                  | UNC vector core | 1:10 in PBS                                                         | 700nl/site       |
| AAV5-CaMKIIa::hChR2 (H134R)-eYFP | UNC vector core | ---                                                                 | 250nl/site       |
| AAV5-EF1 $\alpha$ ::DIO-GFP      | EVCF            | ---                                                                 | 500nl/site       |
| AAV2-retro-CaMKII-iCre           | EVCF            | ---                                                                 | 400nl/site       |
| AAV5-CaMKII::hM4Di-mCherry       | EVCF            | ---                                                                 | 500nl/site       |

2

## 3 *Antibodies*

| Primary Antibodies     |                           |                      |          |
|------------------------|---------------------------|----------------------|----------|
| Antibody               | Source                    | Catalog #            | Dilution |
| Chicken anti-GFAP      | Millipore                 | AB5541               | 1:500    |
| Rabbit anti-NeuN       | Cell Signaling Technology | 12943                | 1:400    |
| Rat anti-BrdU          | Biorad                    | OBT0030G             | 1:200    |
| Guinea pig anti-DCX    | Millipore                 | AB2253               | 1:1000   |
| Rabbit anti c-fos      | Synaptic Systems          | 226 003              | 1:10,000 |
| Secondary Antibodies   |                           |                      |          |
| Antibody               | Conjugated Fluorophore    | Source               | Dilution |
| Donkey anti-chicken    | Alexa Fluor 488           | Jackson Laboratories | 1:500    |
| Donkey anti-rabbit     | Alexa Fluor 488           | Jackson Laboratories | 1:500    |
| Donkey anti-goat       | Alexa Fluor 594           | Jackson Laboratories | 1:400    |
| Donkey anti-guinea pig | Cy5                       | Jackson Laboratories | 1:400    |
| Donkey anti-rat        | Cy5                       | Jackson Laboratories | 1:400    |

4



1 **SUPPLEMENTARY FIGURES**

2  
3 **Figure S1**

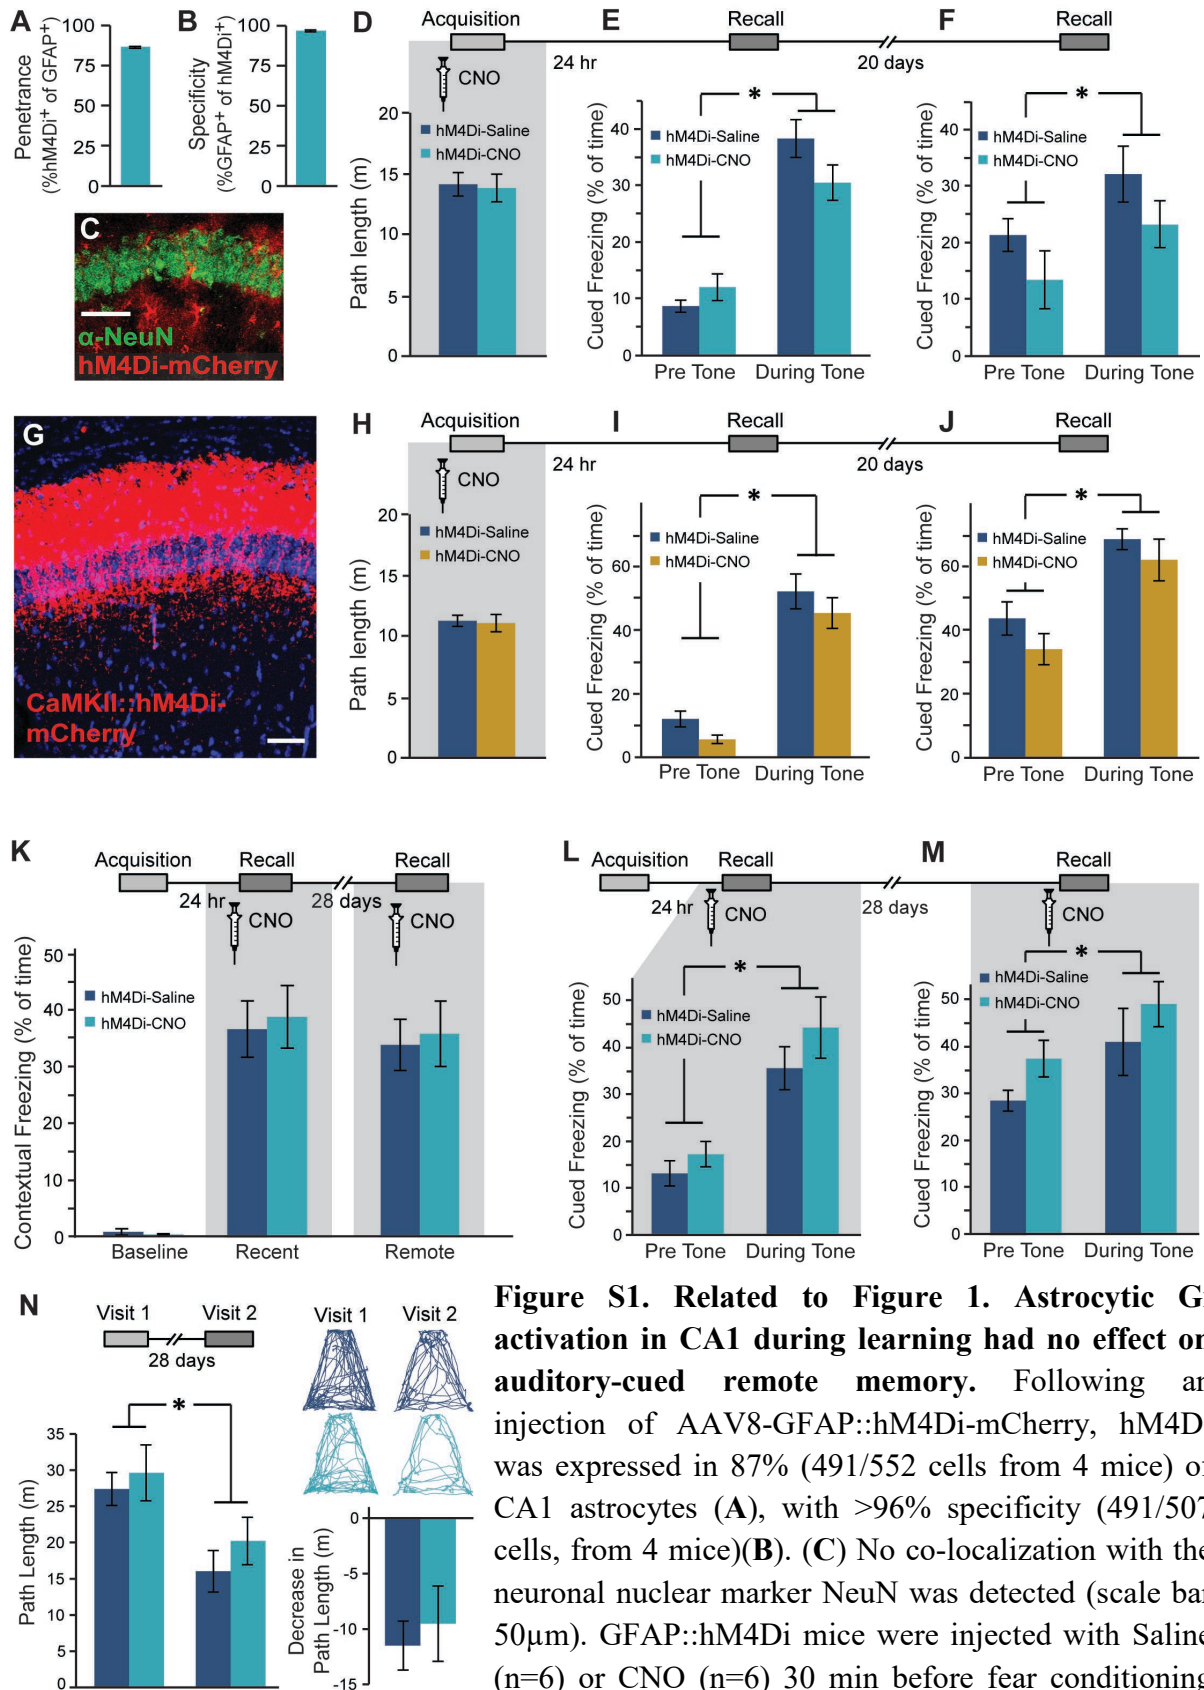

1 (FC) acquisition. CNO application before training had no effect on exploration of the  
2 conditioning cage (**D**), or on auditory-cued memory recall either 24 hr after acquisition (**E**) or  
3 20 days after that (**F**) in a novel context, with both groups showing increased freezing during  
4 tone presentation ( $p < 0.001$ ,  $p < 0.01$ , respectively). (**G**) Bilateral double injection of AAV5-  
5 CaMKII $\alpha$ ::hM4Di-mCherry resulted in hM4Di-mCherry expression in CA1 Neurons only.  
6 Scale bar – 50  $\mu$ m. CaMKII $\alpha$ ::hM4Di mice were injected with either Saline (n=9) or CNO  
7 (n=10) 30min before FC acquisition. CNO application before training had no effect on  
8 exploration of the conditioning cage (**H**), or on auditory-cued memory recall either 24 hr after  
9 acquisition (**I**) or 20 days after that (**J**) in a novel context, with both groups showing increased  
10 freezing during tone presentation ( $p < 0.000001$ ,  $p < 0.00001$ , respectively). (**K**) In a new group  
11 of GFAP::hM4Di mice, CNO administration (n=8) only during the recall tests had no effect  
12 on either recent or remote memory, compared to Saline-injected controls (n=7). In these mice,  
13 CNO administration during recall also had no effect on auditory cued memory either 24 hr  
14 after acquisition (**L**) or 20 days after that (**M**), compared to Saline-injected controls. When  
15 CNO was not administered during acquisition of the non-associative place recognition task,  
16 the GFAP::hM4Di mice (n=6) from Figure 1H showed equivalent performance to controls  
17 (n=6;  $p < 0.01$ )(**N**). Example exploration traces and average  $\Delta$  are shown (*right*). Data  
18 presented as mean  $\pm$  SEM.



1 **Figure S2**

2 **Figure S2. Related to Figure 1.**

3 **CNO application itself during**

4 **learning had no effect on remote**

5 **memory.** (A) Bilateral double

6 injection of AAV8-GFAP-eGFP

7 resulted in eGFP expression in

8 CA1 astrocytes only. Scale bar –

9 left 300 $\mu$ m, right 50  $\mu$ m. Mice

10 expressing eGFP in their CA1

11 astrocytes were injected with either

12 Saline (n=6) or CNO (n=7) 30min

13 before fear conditioning

14 acquisition. CNO administration

15 before training to eGFP-expressing

16 mice had no effect on baseline

17 freezing or recent contextual

18 memory recall one day later (B).

19 Neither did CNO have any effect

20 on remote memory 20 days later or

21 45 days after that (C). In the non-

22 associative place recognition test,

23 CNO application before a first visit

24 to a new environment had no effect

25 on remote memory 28 days later

26 (D), reflected by a similar decrease

27 ( $p < 0.0001$ ) in the exploration

28 between Saline injected (n=6) and

29 CNO-treated mice (n=7) Example

30 exploration traces and the average

31 change ( $\Delta$ ) following treatment are

32 shown on the right. Data presented

33 as mean  $\pm$  SEM.

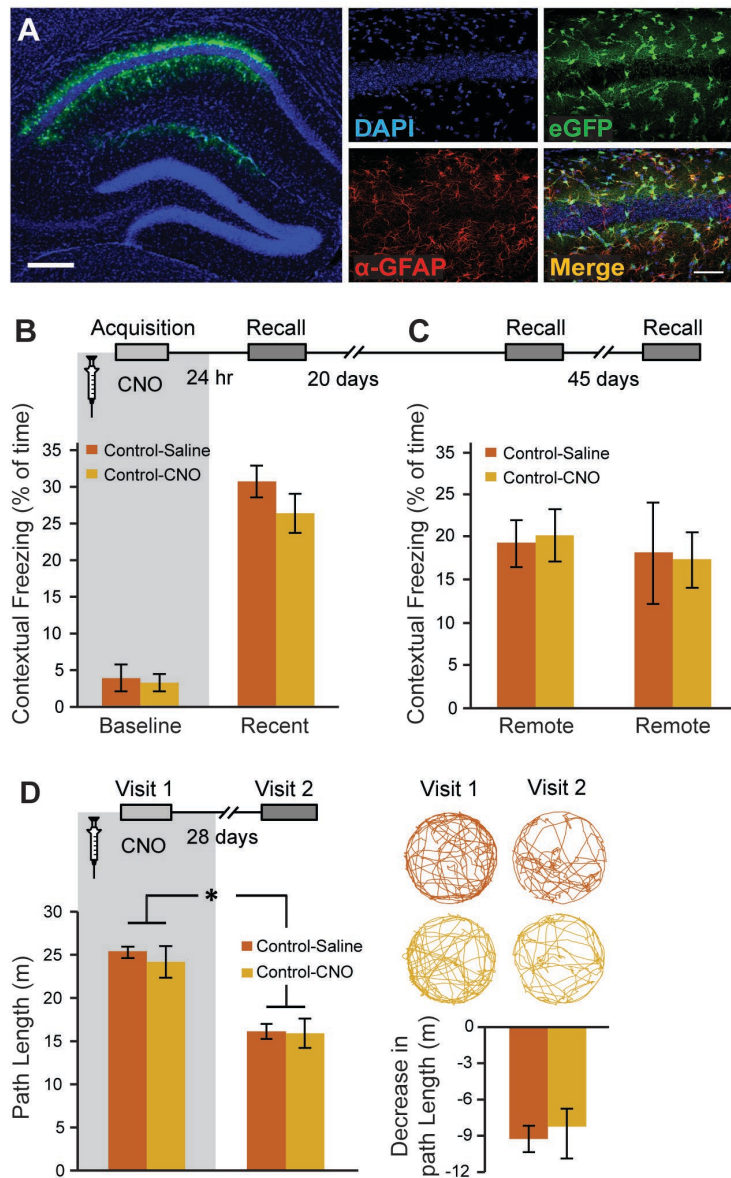

1 **Figure S3**

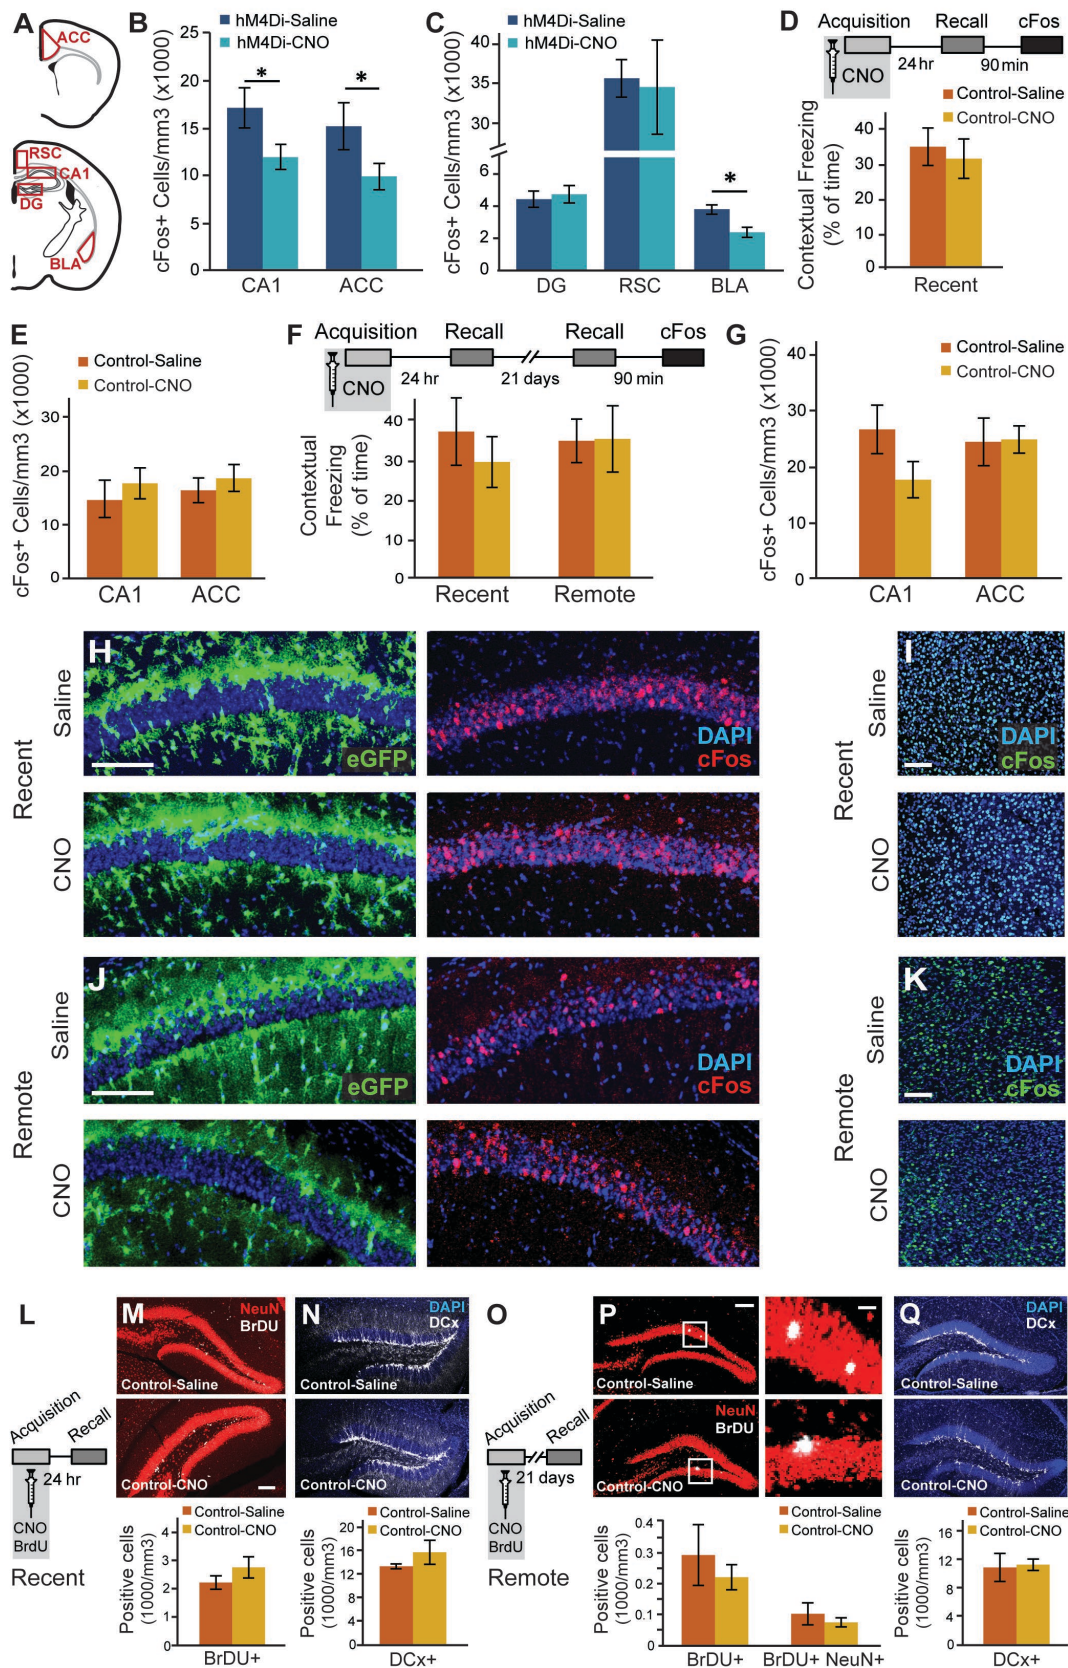

41 **Figure S3. Related to Figure 2. CNO administration during acquisition reduces CA1 and**  
 42 **ACC activity at the time of remote recall only in GFAP::hM4Di mice, and does not affect**  
 43 **neuronal proliferation, differentiation, or survival. (A) Active neurons expressing cFos were**

1 quantified in the CA1, ACC, dentate gyrus (DG), retrosplenial cortex (RSC), and basolateral  
2 amygdala (BLA). GFAP::hM4Di mice from figure 2A,B that were injected with CNO (n=6)  
3 before fear conditioning and showed impaired remote recall compared to Saline controls (n=6),  
4 also demonstrated reduced number of cFos expressing neurons in CA1 and ACC (p<0.05 for  
5 both)(B). No changes in cFos expression in the DG or RSC were observed in these mice, but the  
6 reduced fear was accompanied by a significant reduction in cFos expression in the BLA  
7 (p<0.05)(C). GFAP::eGFP control mice were injected with CNO (n=5) or Saline (n=5) before  
8 fear conditioning, and then tested on the next day. No changes were observed in recent memory  
9 (D) or in the number of neurons active during recent recall in the CA1 or ACC (E). Other  
10 GFAP::eGFP mice were injected with CNO (n=5) or Saline (n=6) before fear conditioning, and  
11 then tested on the next day and again 21 days later. No changes were observed in recent or  
12 remote memory (F), or in the number of neurons active during remote recall in the CA1 or ACC  
13 (G). Representative images of GFAP::eGFP (green) and cFos (red in H,J green in I,K) following  
14 recent (H-I) or remote (J-K) recall in the CA1 (H,J) and ACC (I,K) are presented.  
15 (L) GFAP::eGFP mice were injected with CNO or Saline together with BrdU before fear  
16 conditioning, and then tested on the next day. No changes were observed in stem cell  
17 proliferation (BrdU in white)(M) or in the number of young, Doublecortin (DCx)-positive  
18 neurons (white)(N). (O) GFAP::eGFP mice were injected with CNO or Saline and BrdU before  
19 fear conditioning, and then tested 21 days later. No changes were observed in stem cell  
20 proliferation and differentiation (P) or in the number of young, DCx-positive neurons (Q). Scale  
21 bars = 100µm for CA1, ACC and whole DG, 10 µm for zoomed-in cells. Data presented as mean  
22 ± SEM.



1 **Figure S4**

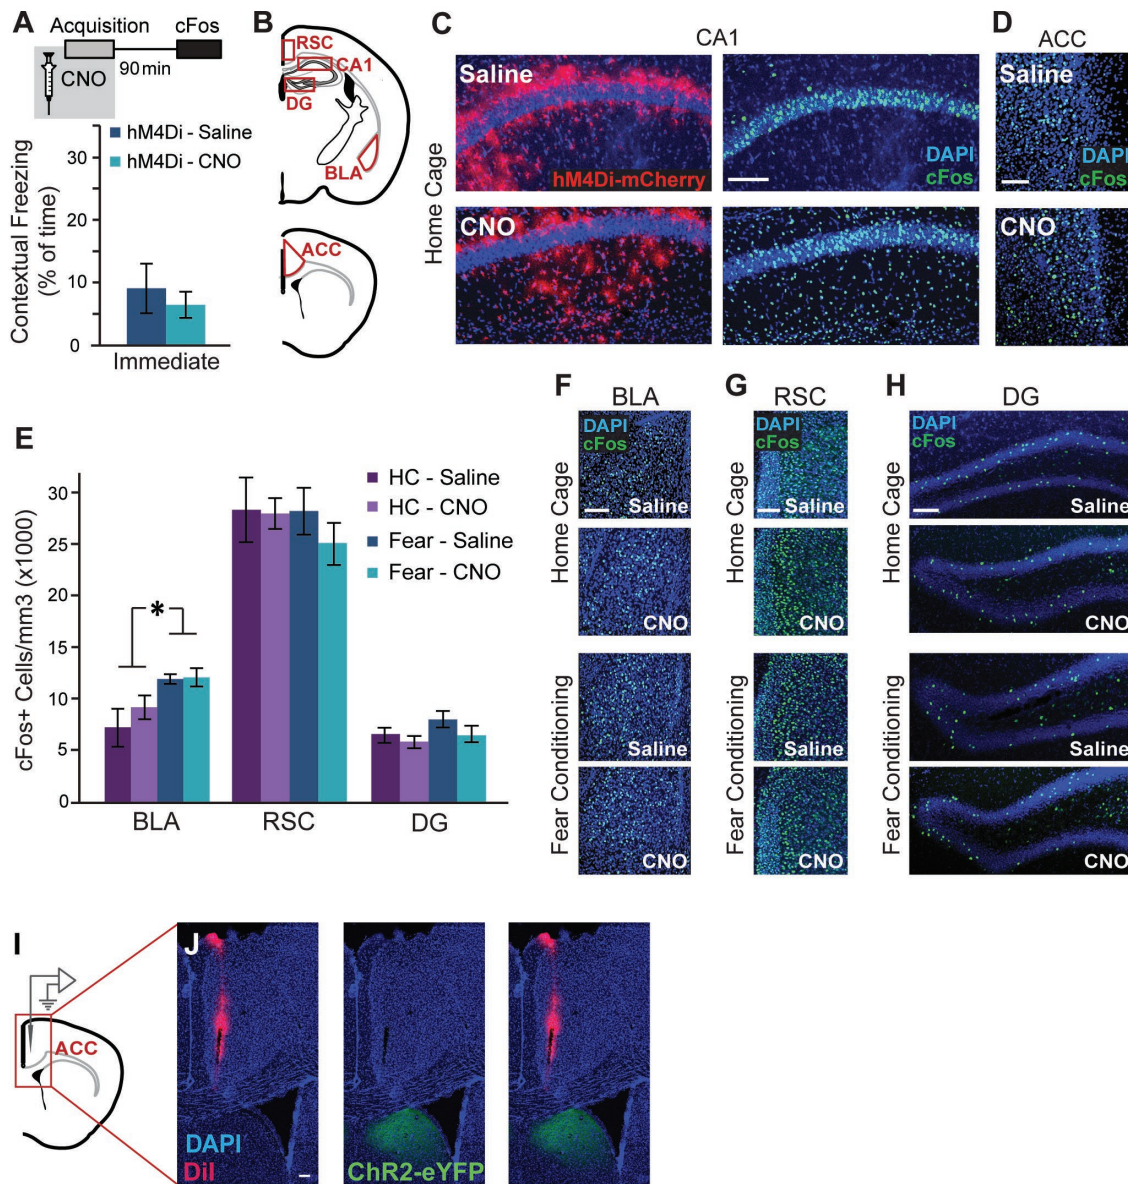

31 **Figure S4. Related to Figure 3. Astrocytic inhibition in CA1 during memory acquisition**

32 **does not affect the recruitment of the RSC and DG.** (A) GFAP::hM4Di mice that were

33 injected with CNO (n=9) or Saline (n=9) 30 minutes before fear conditioning showed similar

34 immediate freezing following shock administration to Saline-injected controls. (B) Active

35 neurons expressing cFos were quantified in the in the CA1, basolateral amygdala (BLA), ACC,

36 retrosplenial cortex (RSC) and dentate gyrus (DG) of GFAP::hM4Di mice that were injected with

37 CNO (n=9) or Saline (n=9) 30 minutes before fear conditioning, or in home-caged mice (CNO

38 n=4, Saline n=4). (C) Representative images of hM4Di (red) and cFos (green) in the CA1 (C)

39 and ACC (D) of home caged GFAP::hM4Di mice showing no effect of CNO administration on

40 cFos levels. cFos-expressing astrocytes are observed below and above the CA1 pyramidal layer.

41 Scale bars=100µm. (E) Fear-conditioned GFAP::hM4Di mice showed increased cFos levels in

42 the BLA compared to home-caged mice (p<0.01), but CNO administration had no effect on either

43 group. Fear-conditioning and CNO administration had no effect on cFos levels in the RSC and

1 DG. Representative images of hM4Di (red) and cFos (green) in the BLA (**F**), RSC (**G**) and DG  
2 (**H**) are presented. (**I**) An electrode dipped in DiI was placed in the ACC to record the response to  
3 CA1 activation. (**J**) The location of the electrode in the ACC is shown in crimson, and no ChR2-  
4 eYFP positive axons (green) are observed in this region. All scale bars = 100 $\mu$ m. Data presented  
5 as mean  $\pm$  SEM.

1 **Figure S5**

2

**CA1 Neurons Projecting to ACC**

3

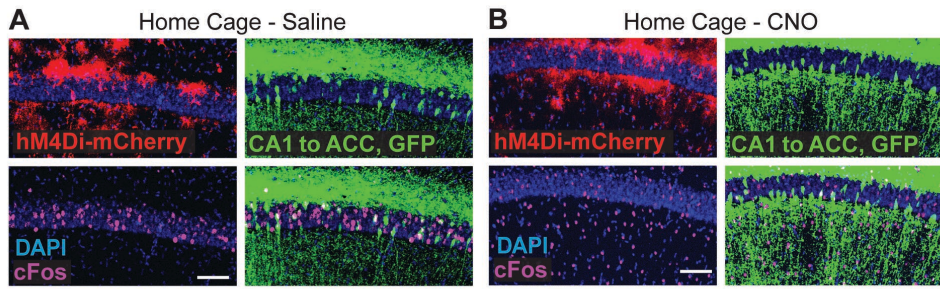

10

**CA1 Neurons Projecting to NAc**

11

12

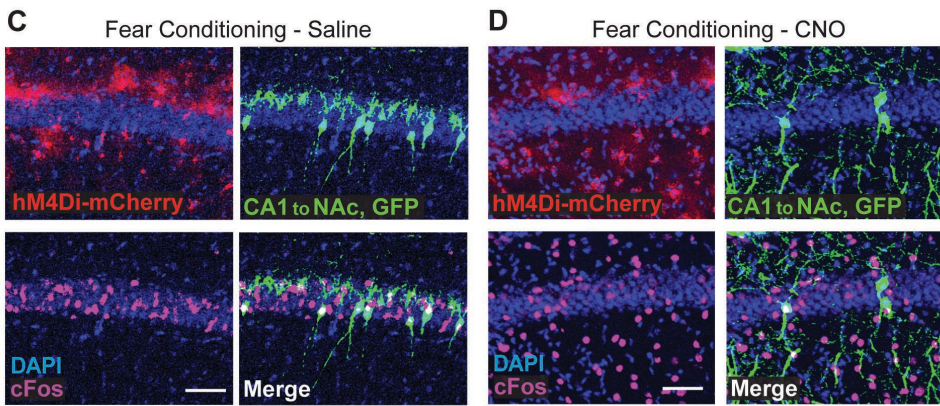

22 **Figure S5. Related to Figure 4. Gi pathway activation in CA1 astrocytes has no effect on**  
23 **cFos expression in home-caged mice. (A-B)** Representative images of hM4Di in astrocytes  
24 (red), GFP in ACC-projecting CA1 neurons (green) and cFos (pink) in the CA1 of Saline- (A) or  
25 CNO- (B) injected home-caged mice are presented. No effect of CNO on cFos levels was  
26 observed. (C-D) Representative images of hM4Di in astrocytes (red), GFP in NAc-projecting  
27 CA1 neurons (green) and cFos (pink) in the CA1 of Saline- (C) or CNO- (D) injected fear-  
28 conditioned mice are presented, showing no effect of the astrocytic manipulation on CA1→NAc  
29 neurons activity. All scale bars=50µm.
